# Supplementary material
Source: Royal Society of Chemistry journal article supplement (doi:10.1039/d5cp05044h)
Supplement: d5cp05044h1.pdf [file d5cp05044h1.pdf]

## Substituent-Modulated Excited-State Dynamics and Solvent-Sensitized Nanosecond Triplet Harvesting in Donor–Acceptor TADF Emitters

M. Faisal Khyasudeen,<sup>a\*</sup> Woon K. L.,<sup>b\*</sup> Gjergji Sini,<sup>c</sup> Levani Skhirtladze,<sup>d</sup> A. Ariffin,<sup>a</sup> Juozas V. Gražulevičius,<sup>d</sup>  
Balqees S. Al-Saadi,<sup>e</sup> and Osama K. Abou-Zied<sup>e\*</sup>

<sup>a</sup>Department of Chemistry, Faculty of Science, University of Malaya, Malaysia

<sup>b</sup>Department of Physics, Faculty of Science, University of Malaya, Malaysia

<sup>c</sup>Laboratoire de Physico-Chimie des Polymères et des Interfaces (LPPI), CY Cergy Paris Université, 33 Bd du  
Port, 95000 Cergy-Pontoise, France

<sup>d</sup>Department of Polymer Chemistry and Technology, Faculty of Chemical Technology, Kaunas University of  
Technology, Lithuania

<sup>e</sup>Department of Chemistry, College of Science, Sultan Qaboos University, P.O. Box 36, Postal Code 123, Muscat,  
Sultanate of Oman

### Supplementary Information

#### Contents

S1 Experimental details

S2 Effect of Oxygen Quenching: Comparison of TCSPC Decays in Air and Argon

S3 Ab Initio Molecular Dynamics

S4 Low Temperature Measurement

S5 Synthesis

## List of Figures

|                                                                                                                                                                                                                                                                                                                                                                                                                                        |    |
|----------------------------------------------------------------------------------------------------------------------------------------------------------------------------------------------------------------------------------------------------------------------------------------------------------------------------------------------------------------------------------------------------------------------------------------|----|
| <b>Figure S1.</b> Time-correlated single-photon counting (TCSPC) measurements of 2Ac-2CF <sub>3</sub> Ph under different atmospheric conditions. ....                                                                                                                                                                                                                                                                                  | 5  |
| <b>Figure S2.</b> Normalized absorption spectra of cyclohexane, toluene, and zeonex. ....                                                                                                                                                                                                                                                                                                                                              | 5  |
| <b>Figure S3:</b> PL decay profiles of the TADF compounds in toluene at 250 nm excitation. The grey trace, R represents the decay of neat toluene measured under identical conditions. ....                                                                                                                                                                                                                                            | 6  |
| <b>Figure S4</b> Hole and Electron NTOs of the S <sub>1</sub> state computed at the S <sub>1</sub> relaxed geometries for 2Ac-2CF <sub>3</sub> Ph, Ac-2CF <sub>3</sub> Ph, 2Ac <sub>2</sub> F <sub>3</sub> Ph, and 2Ac-CF <sub>3</sub> Ph. ....                                                                                                                                                                                        | 7  |
| <b>Figure S5</b> . Probability distribution density plot for ΔE <sub>ST</sub> for (a-d) Ac-2CF <sub>3</sub> Ph and (e-g) 2Ac-CF <sub>3</sub> Ph. ....                                                                                                                                                                                                                                                                                  | 8  |
| <b>Figure S6</b> Spin-orbit coupling for SOC for (a) 2Ac-2CF <sub>3</sub> Ph (only SOC >0.5 cm <sup>-1</sup> is displayed) and (b) Ac-2CF <sub>3</sub> Ph (only SOC >0.3 cm <sup>-1</sup> is displayed). (c) 2Ac-2FPh (SOC>0.1 cm <sup>-1</sup> is displayed) and (d) 2Ac-CF <sub>3</sub> Ph (SOC > 0.5 cm <sup>-1</sup> is displayed) Note the large energy gaps between the states which can slow down the internal conversion. .... | 9  |
| <b>Figure S7</b> Fluorescence and phosphorescence emission at 77K in me-THF with and without gate delay for (a) 2Ac-CF <sub>3</sub> Ph (b) AC-2CF <sub>3</sub> Ph. ....                                                                                                                                                                                                                                                                | 32 |
| <b>Figure S8</b> <sup>1</sup> H NMR spectrum (above) and <sup>13</sup> C NMR spectrum (below) of 2Ac-CF <sub>3</sub> Ph. ....                                                                                                                                                                                                                                                                                                          | 34 |
| <b>Figure S9</b> <sup>1</sup> H NMR spectrum (above) and <sup>13</sup> C NMR spectrum (below) of AC-2CF <sub>3</sub> Ph. ....                                                                                                                                                                                                                                                                                                          | 36 |
| <b>Figure S10.</b> Rescaled time-resolved photoluminescence decay of 2Ac-2CF <sub>3</sub> Ph.....                                                                                                                                                                                                                                                                                                                                      | 37 |
| <b>Figure S11.</b> UV-vis absorption spectrum of 2Ac-2CF <sub>3</sub> Ph in toluene, recorded over an extended spectral range (190–1100 nm).....                                                                                                                                                                                                                                                                                       | 38 |

## List of Tables

|                                                                                                                                                                     |    |
|---------------------------------------------------------------------------------------------------------------------------------------------------------------------|----|
| <b>Table S1.</b> Fitted parameters obtained from the PL decay profiles of the TADF compounds in toluene at 250 nm excitation.....                                   | 6  |
| <b>Table S2-S3</b> SOC of 2Ac-2CF <sub>3</sub> Ph, Ac-2CF <sub>3</sub> Ph, 2Ac-2FPh , 2Ac-CF <sub>3</sub> Ph .....                                                  | 9  |
| <b>Table S4:</b> List of contributions of orbital transitions and its corresponding orbital visualized for vertical absorption based on ground state geometry. .... | 15 |
| <b>Table S5.</b> Calculated IC rate constants for high-lying triplet .....                                                                                          | 26 |

## Section 1. Experimental Details

### Steady State Spectroscopic Measurements

The absorption spectra were recorded using a Varian-Cary 50 UV–visible spectrophotometer in a 1 cm quartz cuvette, with solution concentrations ranging from  $1 \times 10^{-5}$  to  $3 \times 10^{-5}$  M. The solution emission spectra were obtained from  $10^{-5}$  M solutions using a Shimadzu RF5301 PC spectrofluorophotometer. Solid-state emission spectra were recorded using a PerkinElmer LS 55 fluorescence spectrometer.

### Time-Resolved Fluorescence Measurements

Lifetime measurements were conducted using time-correlated single photon counting (TCSPC) with a setup described elsewhere.<sup>1</sup> The TCSPC setup is a component of an ultrafast spectrometer (Halcyone, Ultrafast Systems, LLC) employed for measuring femtosecond fluorescence upconversion. In brief, an excitation source was achieved using a regenerative amplified Ti:sapphire laser (Libra, Coherent). This laser generated compressed pulses centered on 800 nm with a full width at half maximum (fwhm) of 70 fs, a power of 4.26 W, and a repetition rate of 5 kHz. Approximately 90% of the laser output was directed to a Coherent OPerA Solo optical parametric amplifier (Light Conversion Ltd.) to generate spectrally tunable light ranging from 240 to 2600 nm. For the current measurements, the OperA was set to 250 and 350 nm with an energy of approximately 50 nJ. The light passed through a depolarizer (DPU-25, Thorlabs) to eliminate contributions from rotational dynamics. A photomultiplier tube with an instrument response function (IRF) of approximately 250 ps, determined from scattered excitation light, was employed as the detector. The fluorescence signal was attenuated, directed to the detector, and the detection wavelength was adjusted using a monochromator. Decay curves were recorded with a peak channel count of approximately 10,000. The decay transients were fitted to multiexponential functions convoluted with the instrument response function (IRF).

## Section 2. Effect of Oxygen Quenching: Comparison of TCSPC Decays in Air and Argon

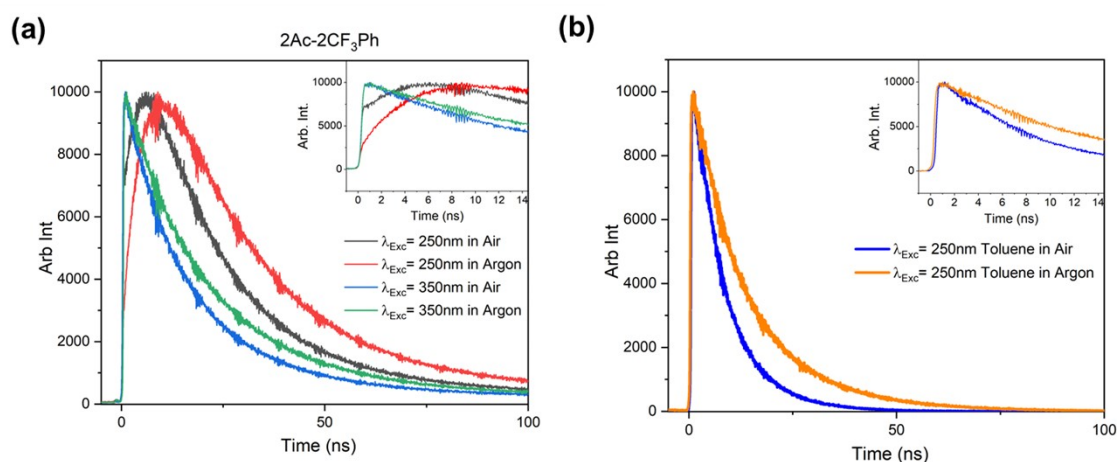

**Figure S1.** Time-correlated single-photon counting (TCSPC) measurements of 2Ac-2CF<sub>3</sub>Ph and neat toluene under different atmospheric conditions. (a) Decays recorded in toluene at  $\lambda_{em} = 550\text{ nm}$  with  $\lambda_{exc} = 250\text{ nm}$  and  $350\text{ nm}$ , comparing air (oxygen present) and argon (oxygen-free) environments. The rise component observed at  $250\text{ nm}$  excitation is reduced in air due to oxygen quenching, compared to the same measurements under argon, confirming the involvement of triplet states. (b) Control experiment showing TCSPC traces of neat toluene at  $\lambda_{exc} = 250\text{ nm}$  in air and argon. The longer decay in argon indicates reduced quenching of toluene triplet states, supporting the Dexter energy transfer (DET) mechanism from solvent triplets to the emitter.

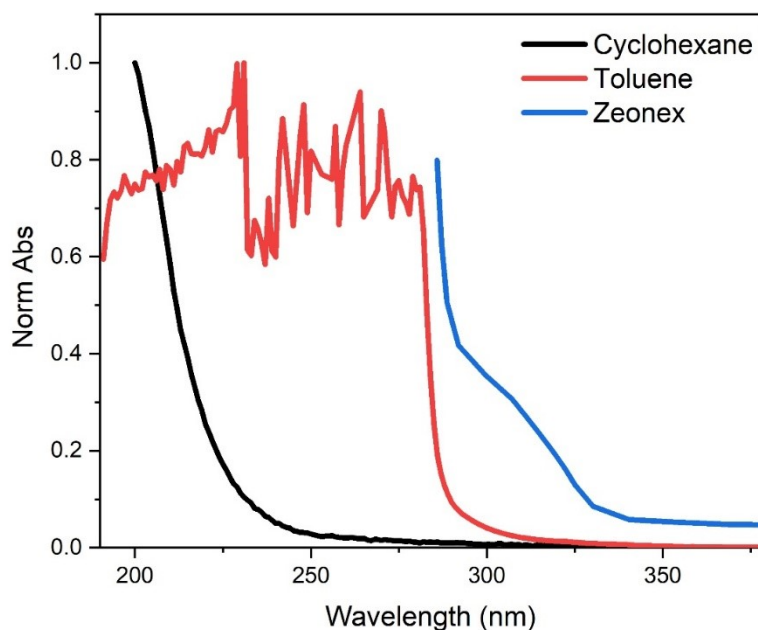

**Figure S2.** Normalized absorption spectra of cyclohexane, toluene, and zeonex.

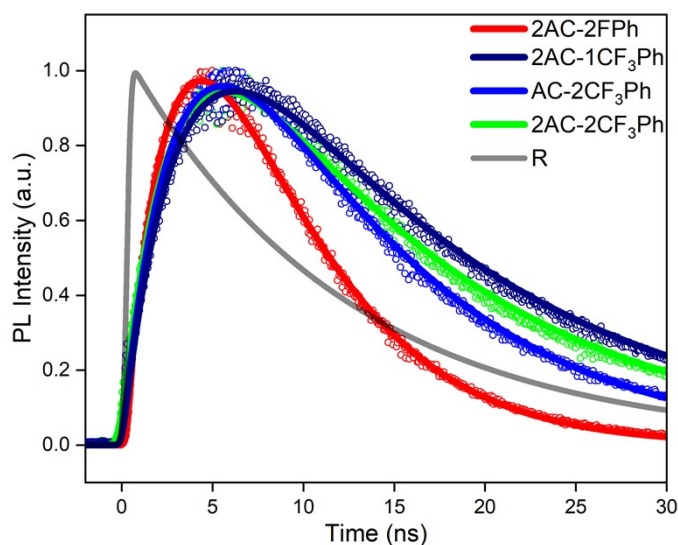

**Figure S3:** PL decay profiles of the TADF compounds in toluene at 250 nm excitation. The grey trace, R represents the decay of neat toluene measured under identical conditions.

**Table S1.** Fitted parameters obtained from the PL decay profiles of the TADF compounds in toluene at 250 nm excitation.

| Compound                     | $A_1$ | $\tau_1$ (ns)      | $A_2$ | $\tau_2$ (ns)       |
|------------------------------|-------|--------------------|-------|---------------------|
| <b>2Ac-2FPh</b>              | -0.50 | <b>3.39 ± 0.27</b> | 0.50  | <b>5.37 ± 0.33</b>  |
| <b>2Ac-CF<sub>3</sub>Ph</b>  | -0.50 | <b>3.25 ± 0.10</b> | 0.50  | <b>14.44 ± 0.22</b> |
| <b>Ac-2CF<sub>3</sub>Ph</b>  | -0.50 | <b>3.41 ± 0.19</b> | 0.50  | <b>9.98 ± 0.32</b>  |
| <b>2Ac-2CF<sub>3</sub>Ph</b> | -0.50 | <b>3.00 ± 0.08</b> | 0.50  | <b>13.13 ± 0.17</b> |

### Section 3 : Ab Initio Molecular Dynamics

All molecular geometries are optimized using density functional calculations performed in Terachem 1.95<sup>2</sup> using the optimally tuned range-separated LC- $\omega$ PBEh functional at def2svp basis level under polarizable continuum model (PCM) with toluene as a solvent.<sup>3</sup> The calculations were performed using a GPU server that had 117 GB RAM installed to support three Tesla Titans graphic cards. The optimized geometries are then subjected to time-dependent ab initio molecular dynamics simulations using the same functional theory and basis set. The temperature is set at 300K using Langevin as a thermostat. Langevin is chosen to simulate the effect of jostling of solvents. The simulations are carried out with 1 femtosecond (fs) time step with 10000 steps. The solvent radius is set to be 3.48 Å and dielectric constant of 2.38, typical values for toluene.

## Internal Conversion Calculation

The ESD module in ORCA 6.0 was employed to compute IC rates between minima on the respective triplet-state potential energy surfaces, using state specific Hessians for both the initial and final states. The calculations were performed at the full TDDFT/ $\omega$ \*PBEh/def2-SVP level. Vibronic effects were treated within the harmonic approximation, including Duschinsky rotation, while bulk solvent effects were described using the implicit CPCM model.

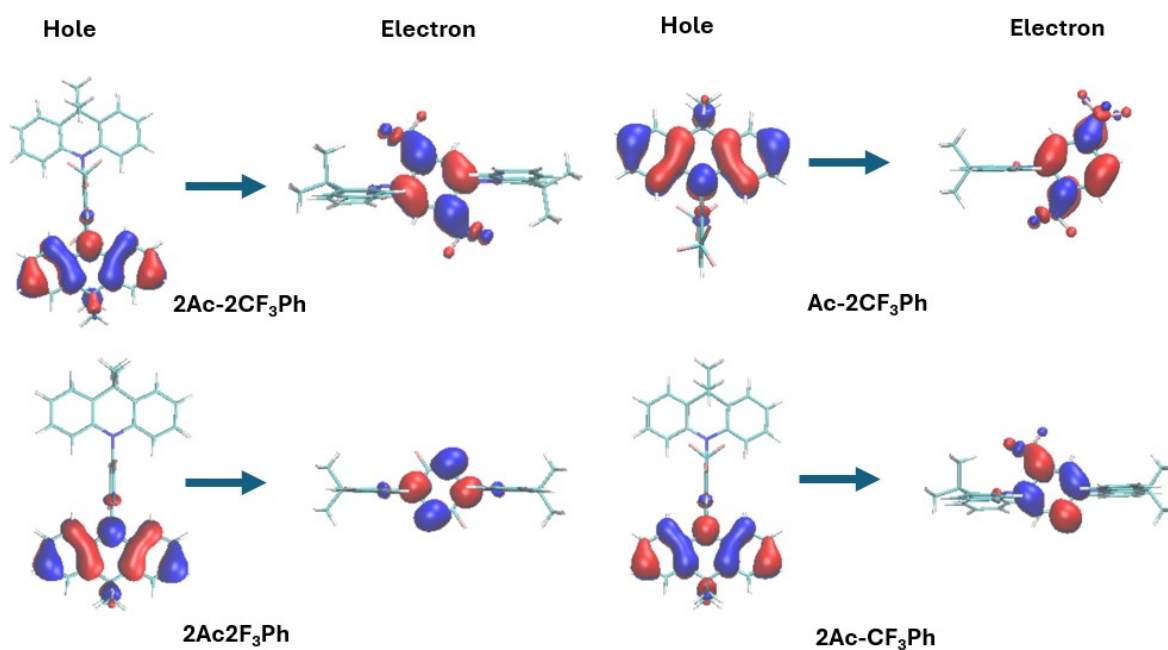

**Figure S4** Hole and Electron NTOs of the  $S_1$  state computed at the  $S_1$  relaxed geometries for 2Ac-2CF<sub>3</sub>Ph, Ac-2CF<sub>3</sub>Ph, 2Ac<sub>2</sub>F<sub>3</sub>Ph, and 2Ac-CF<sub>3</sub>Ph.

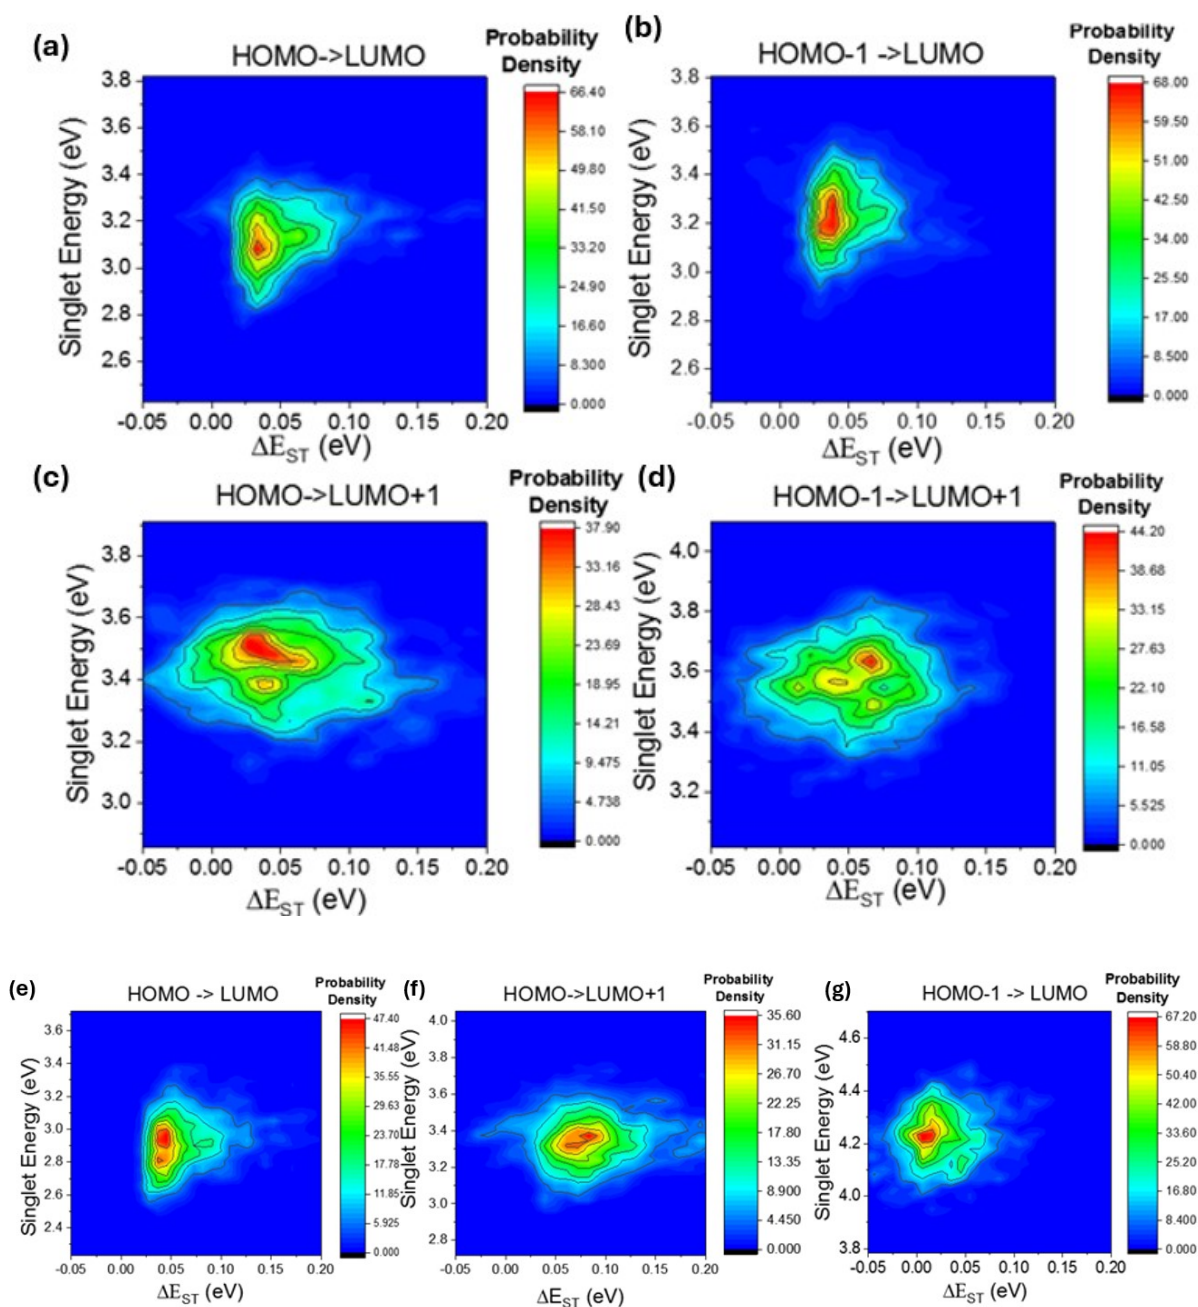

**Figure S5** . Probability distribution density plot for  $\Delta E_{ST}$  for (a-d) Ac-2CF<sub>3</sub>Ph and (e-g) 2Ac-CF<sub>3</sub>Ph.

### Spin-Orbit Coupling

Spin-orbit coupling was calculated using the optimized geometries of the ground and excited states in ORCA 5.0.4,<sup>4</sup> employing the mean-field/effective potential approach with the optimally tuned \* $\omega$ pbeh functional without Tamm–Dancoff Approximation (TDA). All calculations used the same functional and basis set in

toluene. The calculations were carried out in Data-Intensive Computing Centre at University of Malaya.<sup>4</sup>

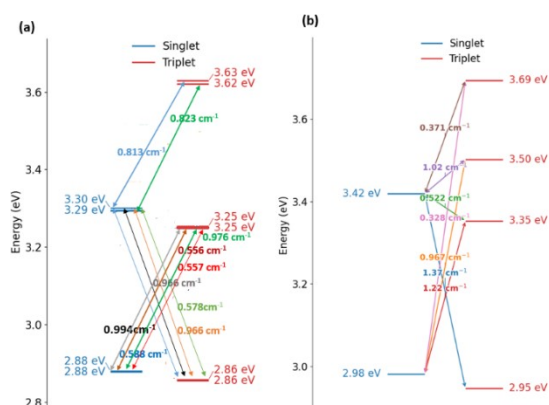

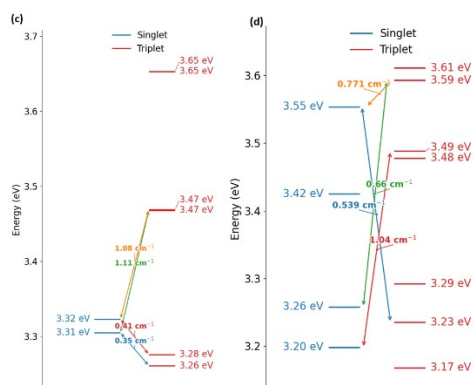

**Figure S6** Spin-orbit coupling for SOC for (a) 2Ac-2CF<sub>3</sub>Ph (only SOC >0.5 cm<sup>-1</sup> is displayed) and (b) Ac-2CF<sub>3</sub>Ph (only SOC >0.3 cm<sup>-1</sup> is displayed). (c) 2Ac-2FPh (SOC >0.1 cm<sup>-1</sup> is displayed) and (d) 2Ac-CF<sub>3</sub>Ph (SOC > 0.5 cm<sup>-1</sup> is displayed) Note the large energy gaps between the states which can slow down the internal conversion.

**Table S2** SOC of 2Ac-2CF<sub>3</sub>Ph, Ac-2CF<sub>3</sub>Ph, 2Ac-2FPh, 2Ac-CF<sub>3</sub>Ph

| Ac-2CF <sub>3</sub> Ph    |                     |                           |                     |                         |
|---------------------------|---------------------|---------------------------|---------------------|-------------------------|
| Triplet (T <sub>m</sub> ) | T <sub>m</sub> (eV) | Singlet (S <sub>n</sub> ) | S <sub>n</sub> (eV) | SOC (cm <sup>-1</sup> ) |
| T1                        | 2.947               | S1                        | 2.982               | 0.03                    |
| T1                        | 2.947               | S2                        | 3.419               | 1.368832                |
| T2                        | 3.353               | S1                        | 2.982               | 1.215278                |
| T2                        | 3.353               | S2                        | 3.419               | 0.522494                |
| T3                        | 3.502               | S1                        | 2.982               | 0.967368                |
| T3                        | 3.502               | S2                        | 3.419               | 1.021959                |
| T4                        | 3.694               | S1                        | 2.982               | 0.327719                |
| T4                        | 3.694               | S2                        | 3.419               | 0.370675                |
| T5                        | 3.936               | S1                        | 2.982               | 1.440833                |
| T5                        | 3.936               | S2                        | 3.419               | 0.628331                |
| 2Ac-CF <sub>3</sub> Ph    |                     |                           |                     |                         |
| Triplet (T <sub>m</sub> ) | T <sub>m</sub> (eV) | Singlet (S <sub>n</sub> ) | S <sub>n</sub> (eV) | SOC (cm <sup>-1</sup> ) |
| T1                        | 3.168               | S1                        | 3.198               | 0.109545                |
| T1                        | 3.168               | S2                        | 3.258               | 0.022361                |
| T1                        | 3.168               | S3                        | 3.425               | 0.399249                |
| T1                        | 3.168               | S4                        | 3.554               | 0.02                    |
| T2                        | 3.235               | S1                        | 3.198               | 0.022361                |
| T2                        | 3.235               | S2                        | 3.258               | 0.051962                |
| T2                        | 3.235               | S3                        | 3.425               | 0                       |
| T2                        | 3.235               | S4                        | 3.554               | 0.538609                |
| T3                        | 3.292               | S1                        | 3.198               | 0.2502                  |
| T3                        | 3.292               | S2                        | 3.258               | 0.033166                |
| T3                        | 3.292               | S3                        | 3.425               | 0.494368                |
| T3                        | 3.292               | S4                        | 3.554               | 0.045826                |
| T4                        | 3.478               | S1                        | 3.198               | 0.152643                |
| T4                        | 3.478               | S2                        | 3.258               | 0.301164                |

|                              |                           |                           |                           |                              |
|------------------------------|---------------------------|---------------------------|---------------------------|------------------------------|
| T4                           | 3.478                     | S3                        | 3.425                     | 0.051962                     |
| T4                           | 3.478                     | S4                        | 3.554                     | 0.323728                     |
| T5                           | 3.488                     | S1                        | 3.198                     | 1.037401                     |
| T5                           | 3.488                     | S2                        | 3.258                     | 0.108167                     |
| T5                           | 3.488                     | S3                        | 3.425                     | 0.491325                     |
| T5                           | 3.488                     | S4                        | 3.554                     | 0.033166                     |
| T6                           | 3.593                     | S1                        | 3.198                     | 0.044721                     |
| T6                           | 3.593                     | S2                        | 3.258                     | 0.660454                     |
| T6                           | 3.593                     | S3                        | 3.425                     | 0.053852                     |
| T6                           | 3.593                     | S4                        | 3.554                     | 0.770584                     |
| T7                           | 3.611                     | S1                        | 3.198                     | 0.267021                     |
| T7                           | 3.611                     | S2                        | 3.258                     | 0.014142                     |
| T7                           | 3.611                     | S3                        | 3.425                     | 0.376431                     |
| T7                           | 3.611                     | S4                        | 3.554                     | 0.014142                     |
| <b>2Ac2FPh</b>               |                           |                           |                           |                              |
| Triplet (T <sub>m</sub> )    | <b>T<sub>m</sub> (eV)</b> | Singlet (S <sub>n</sub> ) | <b>S<sub>n</sub> (eV)</b> | <b>SOC (cm<sup>-1</sup>)</b> |
| T1                           | 3.261                     | S1                        | 3.305                     | 0.35                         |
| T1                           | 3.261                     | S2                        | 3.323                     | 0                            |
| T2                           | 3.276                     | S1                        | 3.305                     | 0                            |
| T2                           | 3.276                     | S2                        | 3.323                     | 0.41                         |
| T3                           | 3.468                     | S1                        | 3.305                     | 1.11                         |
| T3                           | 3.468                     | S2                        | 3.323                     | 0                            |
| T4                           | 3.469                     | S1                        | 3.305                     | 0                            |
| T4                           | 3.469                     | S2                        | 3.323                     | 1.08                         |
| T5                           | 3.653                     | S1                        | 3.305                     | 0                            |
| T5                           | 3.653                     | S2                        | 3.323                     | 0.067082                     |
| T6                           | 3.653                     | S1                        | 3.305                     | 0.072111                     |
| T6                           | 3.653                     | S2                        | 3.323                     | 0                            |
| <b>2Ac-2CF<sub>3</sub>Ph</b> |                           |                           |                           |                              |
| Triplet                      | <b>T<sub>m</sub> (eV)</b> | Singlet (S <sub>n</sub> ) | <b>S<sub>n</sub> (eV)</b> | <b>SOC (cm<sup>-1</sup>)</b> |
| T1                           | 2.856                     | S1                        | 2.878                     | 0.014142                     |
| T1                           | 2.856                     | S2                        | 2.881                     | 0.014142                     |
| T1                           | 2.856                     | S3                        | 3.294                     | 0.588303                     |
| T1                           | 2.856                     | S4                        | 3.301                     | 0.994485                     |
| T2                           | 2.858                     | S1                        | 2.878                     | 0                            |
| T2                           | 2.858                     | S2                        | 2.881                     | 0.014142                     |
| T2                           | 2.858                     | S3                        | 3.294                     | 0.965867                     |
| T2                           | 2.858                     | S4                        | 3.301                     | 0.577841                     |
| T3                           | 3.25                      | S1                        | 2.878                     | 0.966851                     |
| T3                           | 3.25                      | S2                        | 2.881                     | 0.556866                     |
| T3                           | 3.25                      | S3                        | 3.294                     | 0.08544                      |
| T3                           | 3.25                      | S4                        | 3.301                     | 0.094868                     |
| T4                           | 3.254                     | S1                        | 2.878                     | 0.555878                     |
| T4                           | 3.254                     | S2                        | 2.881                     | 0.976371                     |

|    |       |    |       |          |
|----|-------|----|-------|----------|
| T4 | 3.254 | S3 | 3.294 | 0.064031 |
| T4 | 3.254 | S4 | 3.301 | 0.094868 |
| T5 | 3.621 | S1 | 2.878 | 0.121244 |
| T5 | 3.621 | S2 | 2.881 | 0.369865 |
| T5 | 3.621 | S3 | 3.294 | 0.464435 |
| T5 | 3.621 | S4 | 3.301 | 0.812712 |
| T6 | 3.629 | S1 | 2.878 | 0.355949 |
| T6 | 3.629 | S2 | 2.881 | 0.117473 |
| T6 | 3.629 | S3 | 3.294 | 0.822982 |
| T6 | 3.629 | S4 | 3.301 | 0.464435 |

**Table S3** hRISC for 2Ac-2CF<sub>3</sub>Ph, Ac-2CF<sub>3</sub>Ph, 2Ac-2FPh, 2Ac-CF<sub>3</sub>Ph with triplet states are at least 0.1 eV higher than singlet states with reorganization energy set to be 0.1 eV.

| 2Ac-2CF <sub>3</sub> Ph |   |                         |                     |                     |                                 |                                      |
|-------------------------|---|-------------------------|---------------------|---------------------|---------------------------------|--------------------------------------|
| m                       | n | SOC (cm <sup>-1</sup> ) | S <sub>n</sub> (eV) | T <sub>m</sub> (eV) | T <sub>m</sub> - S <sub>n</sub> | k <sub>RISC</sub> (s <sup>-1</sup> ) |
| 3                       | 1 | 0.966851                | 2.878               | 3.250               | 0.372                           | 7.61E+08                             |
| 3                       | 2 | 0.556866                | 2.881               | 3.250               | 0.369                           | 2.52E+08                             |
| 4                       | 1 | 0.555878                | 2.878               | 3.254               | 0.376                           | 2.52E+08                             |
| 4                       | 2 | 0.976371                | 2.881               | 3.254               | 0.373                           | 7.76E+08                             |
| 5                       | 1 | 0.121244                | 2.878               | 3.621               | 0.743                           | 1.20E+07                             |
| 5                       | 2 | 0.369865                | 2.881               | 3.621               | 0.74                            | 1.11E+08                             |
| 5                       | 3 | 0.464435                | 3.294               | 3.621               | 0.327                           | 1.76E+08                             |
| 5                       | 4 | 0.812712                | 3.301               | 3.621               | 0.32                            | 5.38E+08                             |
| 6                       | 1 | 0.355949                | 2.878               | 3.629               | 0.751                           | 1.03E+08                             |
| 6                       | 2 | 0.117473                | 2.881               | 3.629               | 0.748                           | 1.12E+07                             |
| 6                       | 3 | 0.822982                | 3.294               | 3.629               | 0.335                           | 5.51E+08                             |
| 6                       | 4 | 0.464435                | 3.301               | 3.629               | 0.328                           | 1.76E+08                             |
|                         |   |                         |                     |                     | <b>Sum</b>                      | 3.72E+09                             |
| Ac-2CF <sub>3</sub> Ph  |   |                         |                     |                     |                                 |                                      |
| 2                       | 1 | 1.215278                | 2.982               | 3.353               | 0.371                           | 1.202E+09                            |
| 3                       | 1 | 0.967368                | 2.982               | 3.502               | 0.52                            | 7.619E+08                            |
| 4                       | 1 | 0.327719                | 2.982               | 3.694               | 0.712                           | 8.744E+07                            |
| 4                       | 2 | 0.370675                | 3.419               | 3.694               | 0.275                           | 1.119E+08                            |
|                         |   |                         |                     |                     | <b>Sum</b>                      | 2.164E+09                            |
| 2Ac-2FPh                |   |                         |                     |                     |                                 |                                      |
| 3                       | 1 | 1.11                    | 3.305               | 3.468               | 0.163                           | 1.003E+09                            |
| 3                       | 2 | 0                       | 3.323               | 3.468               | 0.145                           | 0.000E+00                            |
| 4                       | 1 | 0                       | 3.305               | 3.468               | 0.163                           | 0.000E+00                            |
| 4                       | 2 | 1.08                    | 3.323               | 3.468               | 0.145                           | 9.496E+08                            |
| 5                       | 1 | 0                       | 3.305               | 3.653               | 0.348                           | 0.000E+00                            |
| 5                       | 2 | 0.067082                | 3.323               | 3.653               | 0.33                            | 3.664E+06                            |
| 6                       | 1 | 0.072111                | 3.305               | 3.653               | 0.348                           | 4.233E+06                            |
| 6                       | 2 | 0                       | 3.323               | 3.653               | 0.33                            | 0.000E+00                            |

|                             |   |          |       |       |            |           |
|-----------------------------|---|----------|-------|-------|------------|-----------|
|                             |   |          |       |       | <b>Sum</b> | 1.961E+09 |
| <b>2Ac-CF<sub>3</sub>Ph</b> |   |          |       |       |            |           |
| 4                           | 1 | 0.152643 | 3.198 | 3.478 | 0.28       | 1.897E+07 |
| 4                           | 2 | 0.301164 | 3.258 | 3.478 | 0.22       | 7.384E+07 |
| 5                           | 1 | 1.037401 | 3.198 | 3.488 | 0.29       | 8.762E+08 |
| 5                           | 2 | 0.108167 | 3.258 | 3.488 | 0.23       | 9.525E+06 |
| 6                           | 1 | 0.044721 | 3.198 | 3.593 | 0.395      | 1.628E+06 |
| 6                           | 2 | 0.660454 | 3.258 | 3.593 | 0.335      | 3.551E+08 |
| 6                           | 3 | 0.053852 | 3.425 | 3.593 | 0.168      | 2.361E+06 |
| 7                           | 1 | 0.267021 | 3.198 | 3.611 | 0.413      | 5.805E+07 |
| 7                           | 2 | 0.014142 | 3.258 | 3.611 | 0.353      | 1.628E+05 |
| 7                           | 3 | 0.376431 | 3.425 | 3.611 | 0.186      | 1.154E+08 |
|                             |   |          |       |       | <b>Sum</b> | 1.511E+09 |

### Excited Toluene density calculation

The data<sup>5</sup> at  $\lambda=250\text{nm}$  gives  $\varepsilon = 1448\text{m}^{-1}\text{cm}^{-1}$ . The molar concentration of toluene is  $9.41 \times 10^3 \text{ molm}^{-3}$ . Using Beer–Lambert’s law in decadic form, a 90% absorption of the incident light ( $T = 0.1$ ,  $A = 1$ ) corresponds to absorption length  $l$ , of  $0.73 \mu\text{m}$ . The illuminated volume is approximated as a cylinder of radius  $r = 50.0 \mu\text{m}$  with height  $l$ . The number of toluene molecules in this volume is  $3.27 \times 10^{13}$  molecules. A 50 nJ pulse of 250nm contains  $6.29 \times 10^{10}$  photons. If each absorbed photon generates one excited toluene molecule, assuming 90% of the pulse energy is absorbed in the volume defined above, the fraction of excited molecules is 0.173%. The corresponding excited-state number density is  $9.83 \times 10^{24} \text{ m}^{-3}$  for singlet in which 45% is converted to triplet giving  $4.42 \times 10^{24} \text{ m}^{-3}$ .

### Numerical Extraction of the Effective Dexter Capture Radius $a_{\text{eff}}$

We model triplet–triplet Dexter transfer in a homogeneous medium using the 3D time-dependent Smoluchowski formulation. The relative motion of a donor–acceptor pair is treated as Brownian diffusion with relative diffusion coefficient  $D_{\text{rel}}$ , and reaction occurs upon encounter within a capture radius  $a_{\text{eff}}$ . For diffusion-controlled reaction in 3D, the time-dependent Smoluchowski second-order rate coefficient is taken as

$$k_2 = 4\pi D_{\text{rel}} a_{\text{eff}} \left[ 1 + \frac{a_{\text{eff}}}{\sqrt{\pi D_{\text{rel}} t}} \right] \quad (\text{S1})$$

where  $t$  is time and  $D_{\text{rel}}$  is the relative diffusion constant. The instantaneous first-order Dexter rate for a single triplet is then

$$k_{\text{Dex}} = k_2 N_{T^*} \quad (\text{S2})$$

The total first-order decay rate of the triplet population includes the intrinsic monomolecular triplet decay of toluene,  $k_T$ , and the Dexter term:

$$k_{tot} = k_T + k_{Dex}(S3)$$

The normalized triplet survival probability  $N_{T^*}$  obeys a first-order kinetic equation with a time-dependent equation:

$$\frac{dN_{T^*}}{dt} = -k_{tot} T(t), \text{ with } T(0) = 1 \quad (S4)$$

The formal solution is

$$N_{T^*} = \exp \left[ - \int_0^t k_{tot} du \right] \quad (S5)$$

Because  $k_{Dex(t)}$  and  $k_{tot(t)}$  varies significantly at short times, we define a population-weighted effective Dexter rate. The full-time dependence of  $k_{Dex(t)}$  into a single effective rate constant  $k_{Dex\_eff}$ , the population-weighted average over the relevant time window can be given as follows:

$$\langle k_{Dex} \rangle_{pop} A_{eff} = \frac{\int_0^{T_{max}} k_{Dex} N_{T^*}(t) dt}{\int_0^{T_{max}} N_{T^*} dt} \quad (S6)$$

$T_{max} = 3 \tau_{rise}$  and  $\tau_{rise}$  is the experimental rise time constant. This definition weights the instantaneous rate by how many excitons are available to react at time  $t$ .

Assuming that  $k_T$  is known independently (from the intrinsic triplet decay of toluene), the corresponding effective Dexter contribution is

$$k_{dex\_eff} = \frac{1}{\tau_{rise}} - k_T \quad (S7)$$

Our goal is to determine  $a_{eff}$  such that

$$\langle k_{Dex} \rangle_{pop} a_{eff} = k_{dex\_eff} \quad (S8)$$

The integrals for  $T(t)$  and  $\langle k_{Dex} \rangle_{pop}$  are evaluated numerically on a uniform time grid using the midpoint rule.

For a given  $\tau_{rise}$ , we define

$$T_{max} = 3 \tau_{rise} \quad (S9)$$

$$\Delta t = \frac{T_{max}}{N_{steps}} \quad (S10)$$

with  $N_{steps} = 8000$ . The midpoints are

$$t_i = \left(i + \frac{1}{2}\right)\Delta t, \quad \text{for } i = 0, 1, \dots, N_{steps} - 1 \quad (S11)$$

At each  $t_i$  we compute  $k_2$ ,  $k_{def\_eff}$  and  $k_{tot}$ . The determination of  $a_{eff}$  is through bisection root finding.

### Python code

```
import math

# Constants
D_rel = 3.79e-9          # m^2/s
k_T = 4.08e7            # s^-1
N_ex = 0.45 * 9.83e24   # m^-3

def kDex_eff_population_weighted(a_eff, tau_rise, n_steps=8000):
    """
    Compute population-weighted effective Dexter rate for a given a_eff and tau_rise.
    k_Dex(t) = k2(t) * N_ex, where
    k2(t) = 4*pi*D_rel*a_eff * (1 + a_eff / sqrt(pi*D_rel*t))
    Total rate k_total(t) = k_T + k_Dex(t).
    We return <k_Dex>_pop = (∫ k_Dex(t) S(t) dt) / (∫ S(t) dt) over [0, 3*tau_rise].
    """
    T_max = 3.0 * tau_rise
    dt = T_max / n_steps
    t_values = [dt * (i + 0.5) for i in range(n_steps)] # midpoints

    k_dex_vals = []
    k_total_vals = []
    for t in t_values:
        k2_t = 4.0 * math.pi * D_rel * a_eff * (1.0 + a_eff / math.sqrt(math.pi * D_rel * t))
        k_dex_t = k2_t * N_ex
        k_dex_vals.append(k_dex_t)
        k_total_vals.append(k_T + k_dex_t)

    # cumulative integral of k_total to get S(t)
    S_vals = []
    cumulative = 0.0
```

```

for k_tot in k_total_vals:
    cumulative += k_tot * dt
    S_vals.append(math.exp(-cumulative))

num = 0.0
den = 0.0
for k_dex_t, S_t in zip(k_dex_vals, S_vals):
    num += k_dex_t * S_t * dt
    den += S_t * dt

return num / den

def solve_a_eff_for_tau(tau_raise_ns, a_min_nm=0.3, a_max_nm=1.5, tol_nm=1e-3, max_iter=50):
    tau_raise = tau_raise_ns * 1e-9 # s
    k_total_eff_target = 1.0 / tau_raise
    k_dex_eff_target = k_total_eff_target - k_T

    a_lo = a_min_nm * 1e-9
    a_hi = a_max_nm * 1e-9
    f_lo = kDex_eff_population_weighted(a_lo, tau_raise) - k_dex_eff_target
    f_hi = kDex_eff_population_weighted(a_hi, tau_raise) - k_dex_eff_target

    # Ensure we bracket a root
    if f_lo * f_hi > 0:
        return None, f_lo, f_hi, k_dex_eff_target

    for _ in range(max_iter):
        a_mid = 0.5 * (a_lo + a_hi)
        f_mid = kDex_eff_population_weighted(a_mid, tau_raise) - k_dex_eff_target
        if abs(a_hi - a_lo) < tol_nm * 1e-9:
            return a_mid, f_mid, k_dex_eff_target, None
        if f_lo * f_mid <= 0:
            a_hi, f_hi = a_mid, f_mid
        else:
            a_lo, f_lo = a_mid, f_mid
    return a_mid, f_mid, k_dex_eff_target, None

taus_ns = [3.00, 3.25, 3.39, 3.41]
results = {}
for tau_ns in taus_ns:
    a_m, f_mid, k_target, _ = solve_a_eff_for_tau(tau_ns)
    if a_m is None:
        results[tau_ns] = ("no_root", f_mid, k_target)
    else:
        a_nm = a_m * 1e9
        results[tau_ns] = (a_nm, f_mid, k_target)

print(results)

```

### **OUTPUT**

```

{3.0: (1.0543945312500003, -54877.29514122009, 292533333.3333333), 3.25: (0.98583984375, -
26648.336749851704, 266892307.69230765), 3.39: (0.9506835937499999, 26011.405223160982,
254185250.73746306), 3.41: (0.9459960937499999, 91270.89239114523, 252455131.96480936)}

```

**Table S4:** List of contributions of orbital transitions and its corresponding orbital visualized for vertical absorption based on ground state geometry.

|                | Singlets (eV) | Transitions (2Ac-2CF <sub>3</sub> Ph) |                | Triples (eV) | Transitions (2Ac-2CF <sub>3</sub> Ph)                        |
|----------------|---------------|---------------------------------------|----------------|--------------|--------------------------------------------------------------|
| S <sub>1</sub> | 2.878         | HOMO -> LUMO :<br>0.962653            | T <sub>1</sub> | 2.856        | HOMO-1 -> LUMO :<br>0.664170; HOMO -> LUMO :<br>0.318128     |
| S <sub>2</sub> | 2.881         | HOMO-1 -> LUMO :<br>0.961228          | T <sub>2</sub> | 2.858        | HOMO-1 -> LUMO :<br>0.318361; HOMO -> LUMO :<br>0.664482     |
| S <sub>3</sub> | 3.294         | HOMO -> LUMO+1 :<br>0.973480          | T <sub>3</sub> | 3.25         | HOMO-1 -> LUMO+1 :<br>0.357148; HOMO -> LUMO+1<br>: 0.613875 |
| S <sub>4</sub> | 3.301         | HOMO-1 -> LUMO+1 :<br>0.971623        | T <sub>4</sub> | 3.254        | HOMO-1 -> LUMO+1 :<br>0.615176; HOMO -> LUMO+1<br>: 0.357538 |
| S <sub>5</sub> | 2.878         | HOMO -> LUMO :<br>0.962653            | T <sub>5</sub> | 3.621        | HOMO-1 -> LUMO+4 :<br>0.638178; HOMO -> LUMO+4<br>: 0.152446 |
|                |               |                                       | T <sub>6</sub> | 3.629        | HOMO-1 -> LUMO+5 :<br>0.149566; HOMO -> LUMO+5<br>: 0.636954 |

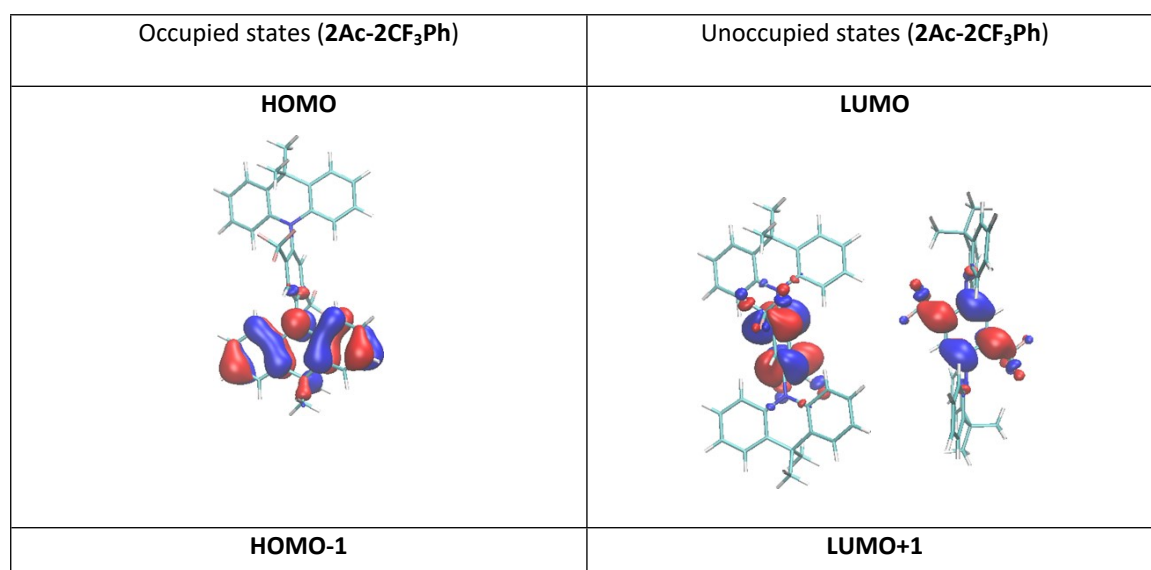

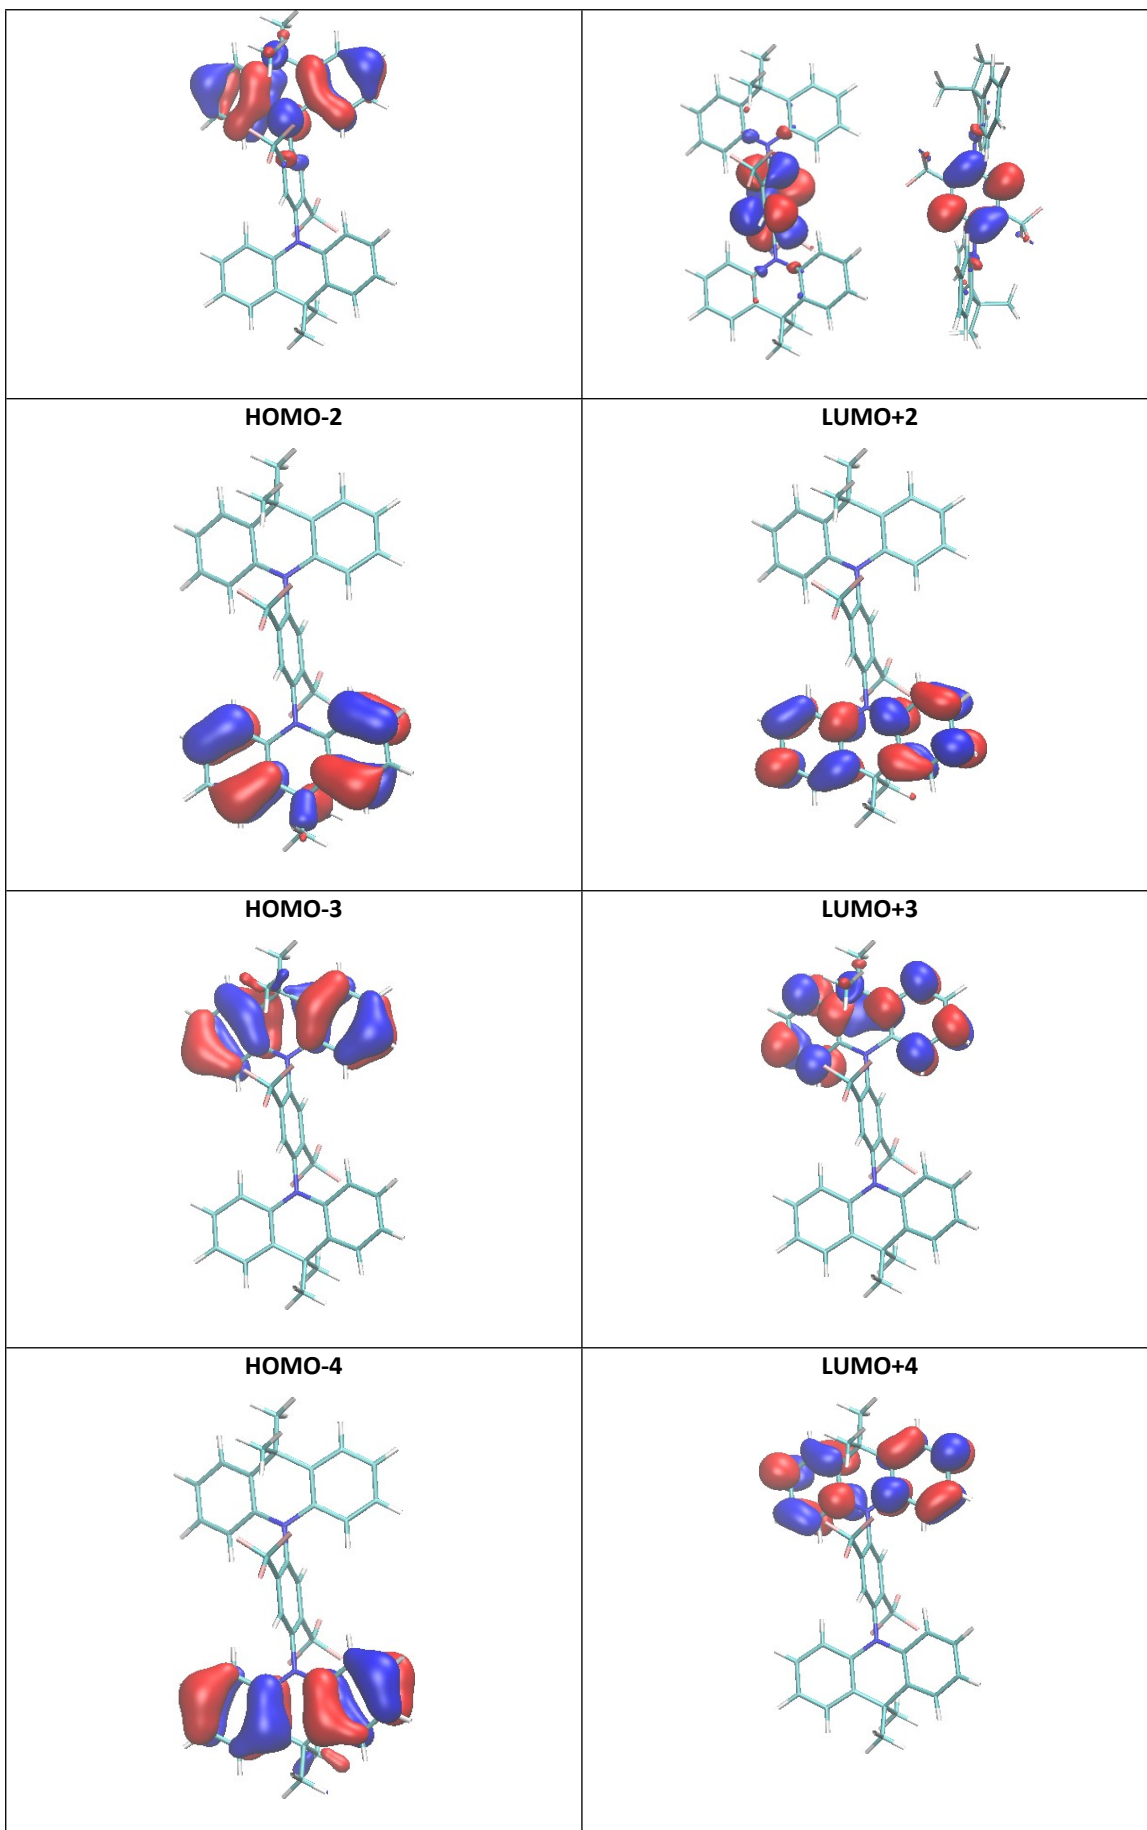

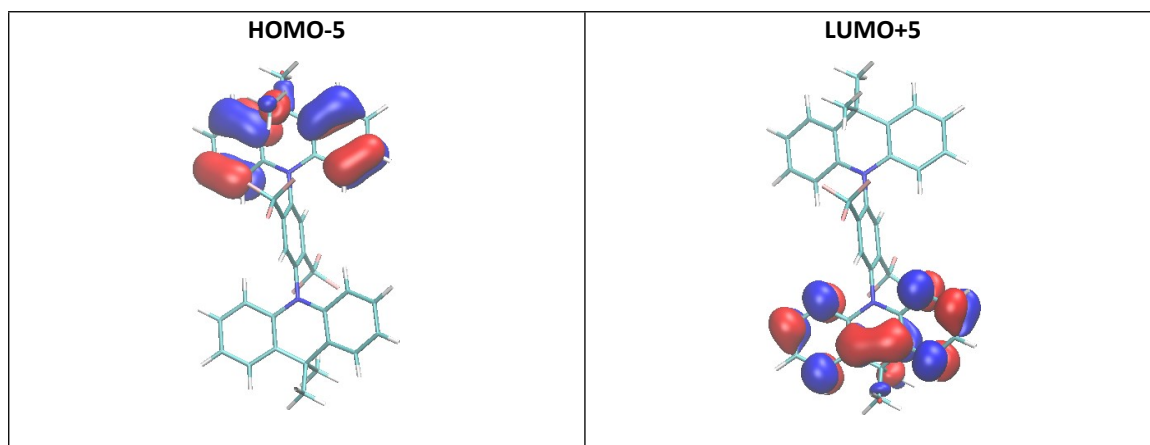

|                | Singlets (eV) | Transitions (2Ac-CF <sub>3</sub> Ph) |                | Triplets (eV) | Transitions (2Ac-CF <sub>3</sub> Ph)                       |
|----------------|---------------|--------------------------------------|----------------|---------------|------------------------------------------------------------|
| S <sub>1</sub> | 3.198         | HOMO -> LUMO :<br>0.952514           | T <sub>1</sub> | 3.168         | HOMO -> LUMO :<br>0.970074                                 |
| S <sub>2</sub> | 3.258         | HOMO-1 -> LUMO :<br>0.937363         | T <sub>2</sub> | 3.235         | HOMO-1 -> LUMO :<br>0.946814                               |
| S <sub>3</sub> | 3.425         | HOMO -> LUMO+1 :<br>0.948412         | T <sub>3</sub> | 3.292         | HOMO -> LUMO+1 :<br>0.711472; HOMO -> LUMO+3<br>: 0.231574 |
| S <sub>4</sub> | 3.554         | HOMO-1 -> LUMO+1 :<br>0.931355       | T <sub>4</sub> | 3.478         | HOMO-1 -> LUMO+1 :<br>0.826551                             |
|                |               |                                      | T <sub>5</sub> | 3.488         | HOMO -> LUMO+1 :<br>0.238598; HOMO -> LUMO+3<br>: 0.581005 |
|                |               |                                      | T <sub>6</sub> | 3.593         | HOMO-1 -> LUMO+5 :<br>0.743182                             |
|                |               |                                      | T <sub>7</sub> | 3.611         | HOMO -> LUMO+2 :<br>0.936403                               |

| Occupied states (2Ac-CF <sub>3</sub> Ph)                                                                                                                                                                                                                                             | Unoccupied states (2Ac-CF <sub>3</sub> Ph)                                                                                                                                                                                                                                            |
|--------------------------------------------------------------------------------------------------------------------------------------------------------------------------------------------------------------------------------------------------------------------------------------|---------------------------------------------------------------------------------------------------------------------------------------------------------------------------------------------------------------------------------------------------------------------------------------|
| <p style="text-align: center;"><b>HOMO</b></p> 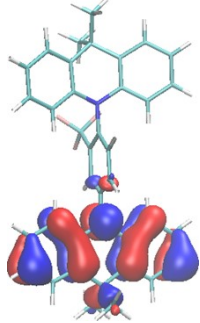 <p>The HOMO orbital is localized on the lower ring system, showing a delocalized π system with positive (red) and negative (blue) phases.</p>       | <p style="text-align: center;"><b>LUMO</b></p>  <p>The LUMO orbital is localized on the upper ring system, showing a delocalized π system with positive (red) and negative (blue) phases.</p>       |
| <p style="text-align: center;"><b>HOMO-1</b></p>  <p>The HOMO-1 orbital is localized on the upper ring system, showing a delocalized π system with positive (red) and negative (blue) phases.</p>  | <p style="text-align: center;"><b>LUMO+1</b></p>  <p>The LUMO+1 orbital is localized on the upper ring system, showing a delocalized π system with positive (red) and negative (blue) phases.</p>  |
| <p style="text-align: center;"><b>HOMO-2</b></p>  <p>The HOMO-2 orbital is localized on the upper ring system, showing a delocalized π system with positive (red) and negative (blue) phases.</p> | <p style="text-align: center;"><b>LUMO+2</b></p>  <p>The LUMO+2 orbital is localized on the lower ring system, showing a delocalized π system with positive (red) and negative (blue) phases.</p> |
| <p style="text-align: center;"><b>HOMO-3</b></p>  <p>The HOMO-3 orbital is localized on the upper ring system, showing a delocalized π system with positive (red) and negative (blue) phases.</p> | <p style="text-align: center;"><b>LUMO+3</b></p>  <p>The LUMO+3 orbital is localized on the lower ring system, showing a delocalized π system with positive (red) and negative (blue) phases.</p> |
| <p style="text-align: center;"><b>HOMO-4</b></p>                                                                                                                                                                                                                                     | <p style="text-align: center;"><b>LUMO+4</b></p>                                                                                                                                                                                                                                      |

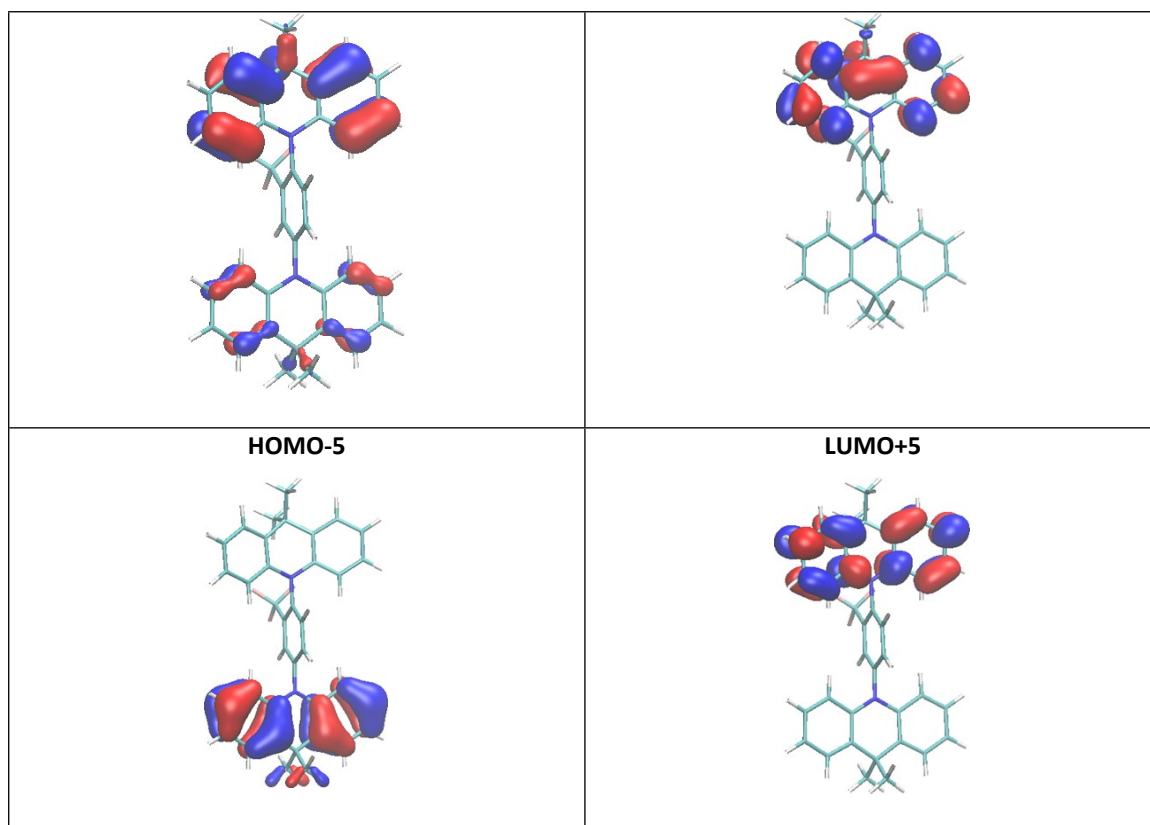

|                | Singlets (eV) | Transitions (2Ac2FPh)        |                | Triplets (eV) | Transitions (2Ac2FPh)                                        |
|----------------|---------------|------------------------------|----------------|---------------|--------------------------------------------------------------|
| S <sub>1</sub> | 3.305         | HOMO -> LUMO :<br>0.982980   | T <sub>1</sub> | 3.261         | HOMO -> LUMO :<br>0.920935                                   |
| S <sub>2</sub> | 3.323         | HOMO-1 -> LUMO :<br>0.982323 | T <sub>2</sub> | 3.276         | HOMO-1 -> LUMO :<br>0.908714                                 |
|                |               |                              | T <sub>3</sub> | 3.468         | HOMO-1 -> LUMO+4 :<br>0.373752; HOMO -><br>LUMO+5 : 0.331640 |
|                |               |                              | T <sub>4</sub> | 3.469         | HOMO-1 -> LUMO+5 :<br>0.323668; HOMO -><br>LUMO+4 : 0.375167 |
|                |               |                              | T <sub>5</sub> | 3.653         | HOMO-1 -> LUMO+2 :<br>0.462518; HOMO -><br>LUMO+3 : 0.472314 |
|                |               |                              | T <sub>6</sub> | 3.653         | HOMO-1 -> LUMO+3 :<br>0.461405; HOMO -><br>LUMO+2 : 0.473618 |

| Occupied states (2Ac2FPh)                                                                                                            | Unoccupied states (2Ac2FPh)                                                                                                           |
|--------------------------------------------------------------------------------------------------------------------------------------|---------------------------------------------------------------------------------------------------------------------------------------|
| <p style="text-align: center;"><b>HOMO</b></p> 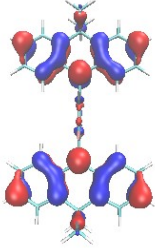     | <p style="text-align: center;"><b>LUMO</b></p>      |
| <p style="text-align: center;"><b>HOMO-1</b></p>   | <p style="text-align: center;"><b>LUMO+1</b></p>   |
| <p style="text-align: center;"><b>HOMO-2</b></p>  | <p style="text-align: center;"><b>LUMO+2</b></p>  |
| <p style="text-align: center;"><b>HOMO-3</b></p>  | <p style="text-align: center;"><b>LUMO+3</b></p>  |

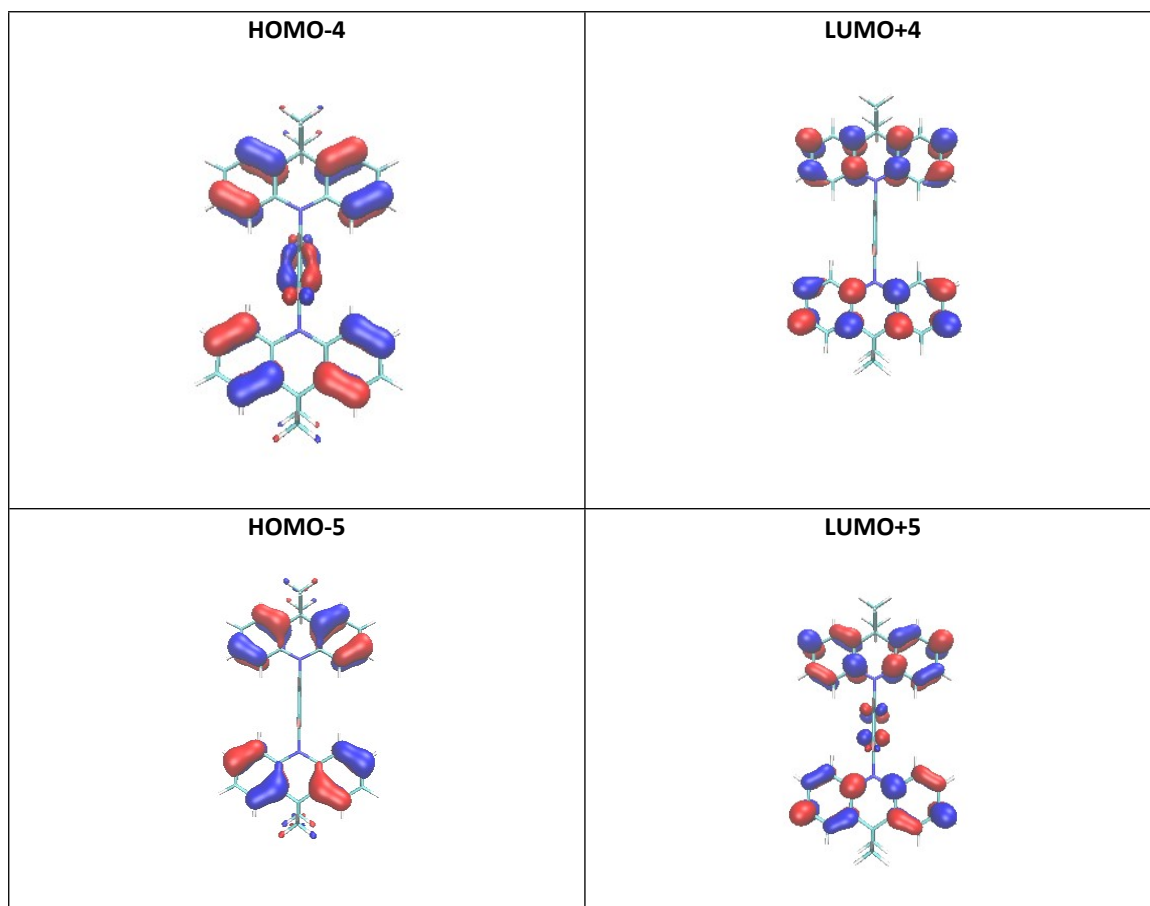

|                | Singlets (eV) | Transitions (Ac-2CF <sub>3</sub> Ph) |                | Triplets (eV) | Transitions (Ac-2CF <sub>3</sub> Ph) |
|----------------|---------------|--------------------------------------|----------------|---------------|--------------------------------------|
| S <sub>1</sub> | 2.982         | HOMO -> LUMO :<br>0.973383           | T <sub>1</sub> | 2.947         | HOMO -> LUMO :<br>0.975414           |
| S <sub>2</sub> | 3.419         | HOMO -> LUMO+1 :<br>0.971779         | T <sub>2</sub> | 3.353         | HOMO -> LUMO+1 :<br>0.878776         |
|                |               |                                      | T <sub>3</sub> | 3.502         | HOMO -> LUMO+3 :<br>0.742126         |
|                |               |                                      | T <sub>4</sub> | 3.694         | HOMO -> LUMO+2 :<br>0.927118         |

| Occupied states (Ac-2CF <sub>3</sub> Ph) | Unoccupied states (Ac-2CF <sub>3</sub> Ph) |
|------------------------------------------|--------------------------------------------|
| <b>HOMO</b>                              | <b>LUMO</b>                                |

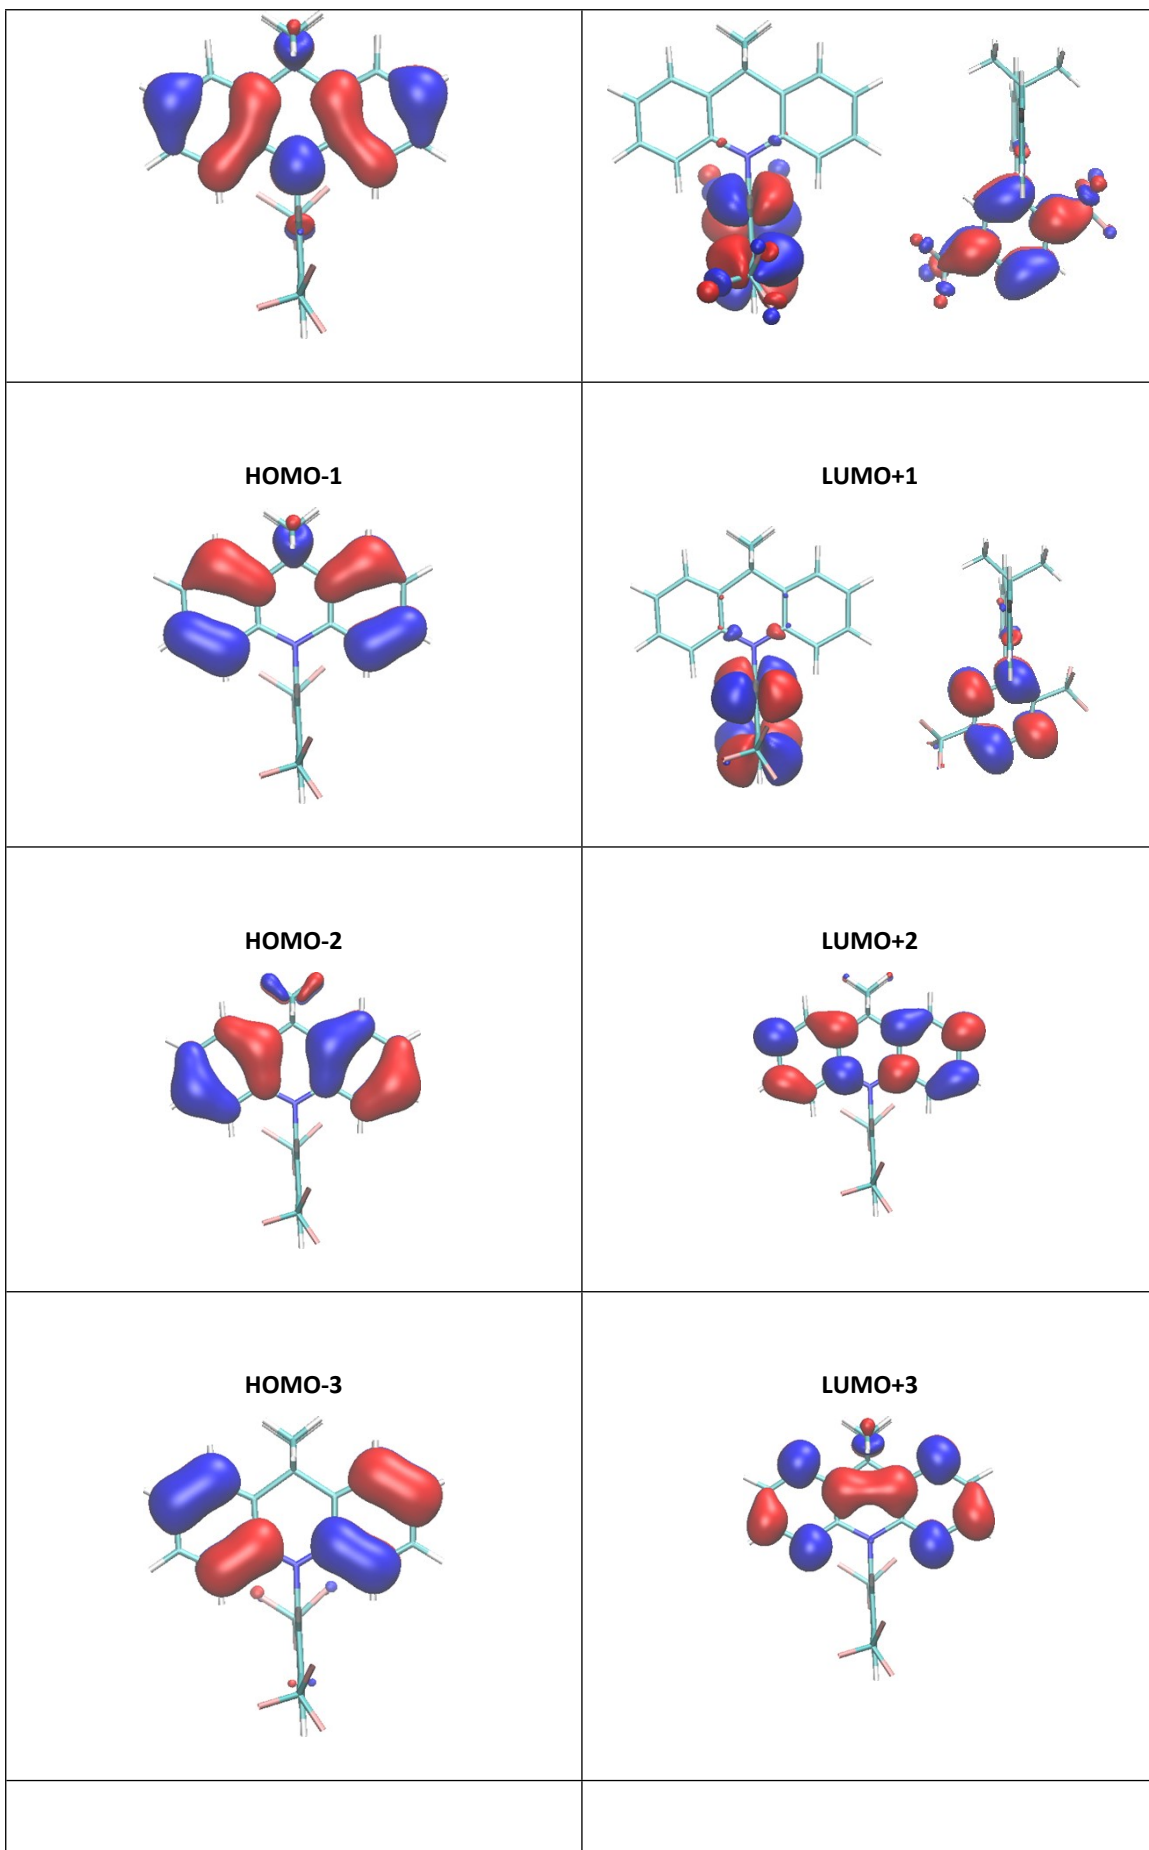

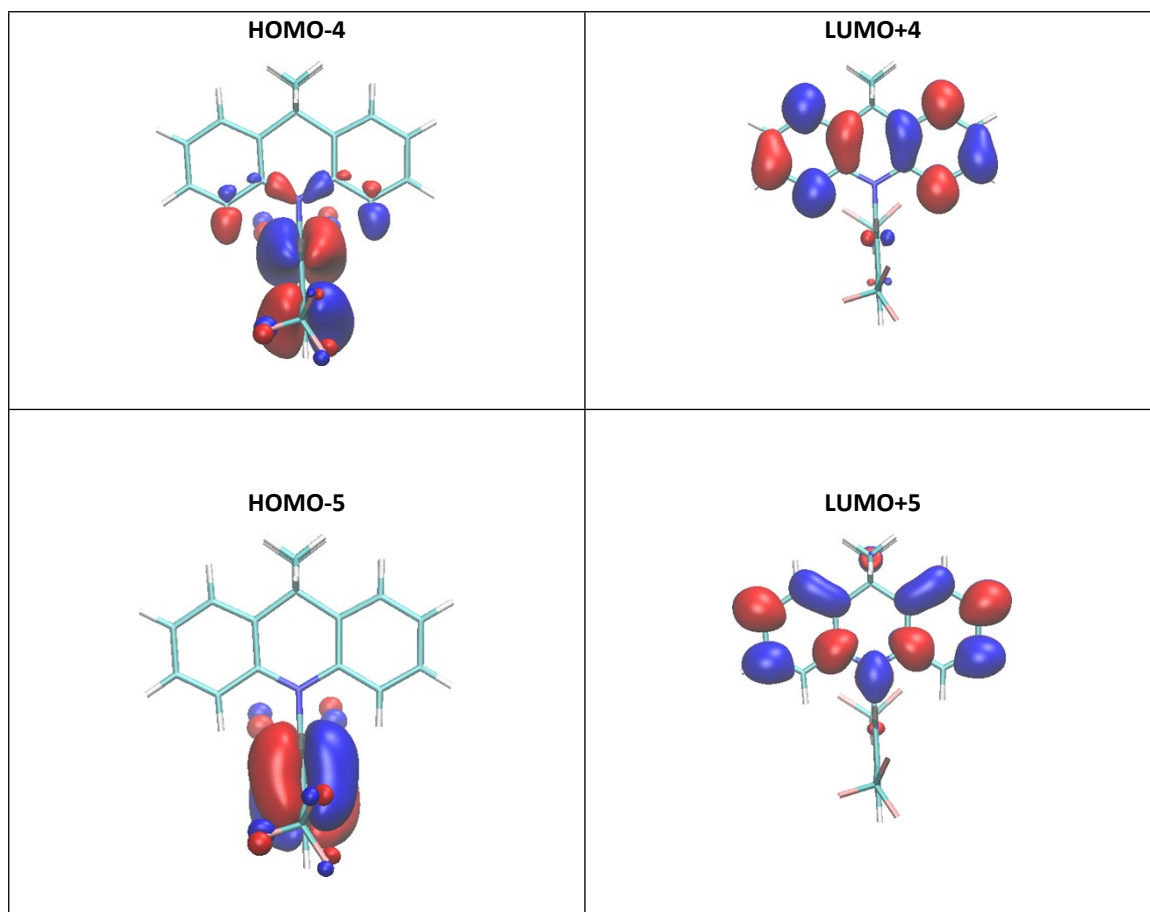

**Table S5.** Calculated IC rate constants for high-lying triplet to  $T_1$  transitions in the studied molecules.

| Molecule                | Transition            | Internal conversion rate, $k_{IC}$ ( $s^{-1}$ ) | $\tau_{IC}$ ( $1/k_{IC}$ ) |
|-------------------------|-----------------------|-------------------------------------------------|----------------------------|
| Ac-2CF <sub>3</sub> Ph  | $T_4 \rightarrow T_1$ | $7.37 \times 10^{10}$                           | 13.6 ps                    |
| 2Ac-2CF <sub>3</sub> Ph | $T_4 \rightarrow T_1$ | $1.58 \times 10^{10}$                           | 63.3 ps                    |
| 2Ac-CF <sub>3</sub> Ph  | $T_6 \rightarrow T_1$ | $1.18 \times 10^{10}$                           | 84.7 ps                    |
| 2Ac-2F <sub>3</sub> Ph  | $T_4 \rightarrow T_1$ | $1.23 \times 10^9$                              | 813 ps                     |

xyz coordinates of Ac-2CF<sub>3</sub>Ph  $\omega=0.0662$  optimized at DFT/ $\omega$ \*pbeh/de2-svp PCM in Toluene

```

C  3.6793958171  0.6238095740 -0.0476641690
C  3.6704667204 -0.7705703551 -0.0693679654
C  2.4623336290 -1.4573867636 -0.1062711400
C  1.2342449181 -0.7674925534 -0.1240170062
C  1.2272062093  0.6414778383 -0.0913660687
C  2.4630471952  1.3020131583 -0.0577789126
N  0.0287846897 -1.4865358285 -0.1861946312
C -1.2164695856 -0.8423018738 -0.0965053771
C -1.2938906577  0.5645446212 -0.0608777403
C -0.0601464615  1.4636875128 -0.1119641927

```

C -2.3999879760 -1.6052843714 -0.0535569011  
C -3.6463623479 -0.9931034499 0.0142682144  
C -3.7389236132 0.3980718047 0.0410363436  
C -2.5664104036 1.1486483534 0.0038316292  
C -0.1009276912 2.2964433545 -1.4114961127  
C -0.0728623756 2.4097078243 1.1072939346  
C 0.0724121832 -2.9049331625 -0.0734758624  
C 0.0940230237 -3.4789003169 1.2006134993  
C 0.1386087417 -4.8636323634 1.3581373776  
C 0.1682059725 -5.6926793006 0.2350684590  
C 0.1457330777 -5.1280942163 -1.0380482713  
C 0.0960256339 -3.7403161753 -1.2045381236  
C 0.1105068665 -5.4657968145 2.7416878882  
F -1.1337209926 -5.8231779640 3.0941320589  
F 0.8693459463 -6.5669559514 2.8163183091  
F 0.5520930716 -4.6004730928 3.6627004621  
C 0.0765004778 -3.1604260315 -2.6046977553  
F 0.0760855150 -4.1318409285 -3.5315008485  
F -1.0128073922 -2.4146571363 -2.8196286534  
F 1.1500641031 -2.3975658241 -2.8397223801  
H 4.6217776712 1.1790941593 -0.0250972578  
H 4.6087382077 -1.3342555117 -0.0622443935  
H 2.4704586863 -2.5488697256 -0.1360575873  
H 2.4709424873 2.3962217634 -0.0411195867  
H -2.3434121464 -2.6953731197 -0.0861377976  
H -4.5481588582 -1.6129231692 0.0415346090  
H -4.7122889557 0.8953320204 0.0878740871  
H -2.6416064501 2.2403955878 0.0229350919  
H -0.0949675699 1.6407778802 -2.2968153191  
H 0.7719735095 2.9665559767 -1.4757519352  
H -1.0097490829 2.9192377016 -1.4524158881  
H -0.0367285797 1.8374647855 2.0482121633  
H -0.9816963534 3.0322869974 1.1210341908  
H 0.7909779101 3.0932218174 1.0899377344  
H 0.0809124459 -2.8186484526 2.0715449220  
H 0.2146137624 -6.7785497520 0.3554977841  
H 0.1691105372 -5.7706152540 -1.9213314717

XYZ coordinates of 2Ac-CF<sub>3</sub>Ph  $\omega = 0.0560$  optimized at DFT/ $\omega$ \*pbeh/de2-svp PCM in Toluene

|   |               |                |               |
|---|---------------|----------------|---------------|
| C | 3.5910221366  | 0.7029705726   | -0.4849303656 |
| C | 3.6041843333  | -0.6828316642  | -0.6283617626 |
| C | 2.4217669283  | -1.4087346105  | -0.5062186543 |
| C | 1.2035077696  | -0.7565242358  | -0.2509548336 |
| C | 1.1666622688  | 0.6527088259   | -0.1590123803 |
| C | 2.3759456814  | 1.3500626618   | -0.2557265673 |
| N | 0.0125236796  | -1.4901688036  | -0.0843842769 |
| C | -1.0745440909 | -0.9113490712  | 0.6008357154  |
| C | -1.1547555331 | 0.4951217084   | 0.7065811893  |
| C | -0.1850462190 | 1.3590637938   | -0.0949724960 |
| C | -2.0708883465 | -1.7133921369  | 1.1826405885  |
| C | -3.1170792011 | -1.1378738195  | 1.8999782424  |
| C | -3.1795462411 | 0.2448959641   | 2.0567630598  |
| C | -2.2021860611 | 1.0404349550   | 1.4570294004  |
| C | -0.7279518210 | 1.4672904356   | -1.5416982392 |
| C | -0.0680394046 | 2.7733513461   | 0.4796830187  |
| C | 0.0690690640  | -2.9111474797  | -0.1869437754 |
| C | 0.5174345827  | -3.6717979628  | 0.8994756878  |
| C | 0.5697246090  | -5.0614613659  | 0.8245574503  |
| C | 0.1693751775  | -5.7147607213  | -0.3451709572 |
| C | -0.2710544949 | -4.9635373401  | -1.4375320160 |
| C | -0.3201225228 | -3.5686049395  | -1.3670080871 |
| N | 0.2095526458  | -7.1365225765  | -0.4171111217 |
| C | 1.3855628841  | -7.7637253095  | -0.8489956273 |
| C | 1.4993901415  | -9.1699195415  | -0.8290390104 |
| C | 0.3701251643  | -10.0852276606 | -0.3565807730 |
| C | -0.8537396803 | -9.2791380950  | 0.0793213551  |
| C | -0.8971263222 | -7.8696872409  | 0.0309147472  |
| C | -1.9909950972 | -9.9533869943  | 0.5435450020  |
| C | -3.1477151632 | -9.2909861070  | 0.9491899790  |
| C | -3.1796330601 | -7.8983131694  | 0.8886413785  |
| C | -2.0679355688 | -7.1965040378  | 0.4355644144  |
| C | 2.4676359658  | -6.9857021243  | -1.3088752305 |
| C | 3.6474203884  | -7.5821305255  | -1.7407374966 |

C 3.7758856108 -8.9703683039 -1.7210779071  
C 2.7036194611 -9.7361417456 -1.2678295280  
C -0.0371241852 -11.0200619062 -1.5162846719  
C 0.8693571722 -10.9299262534 0.8356689100  
C -0.7904534626 -2.7795437692 -2.5690882925  
F -1.0654744526 -3.5823031443 -3.6062563149  
F -1.9058634760 -2.0828515891 -2.3047159260  
F 0.1383155442 -1.9065271250 -2.9851125413  
H 4.5155313844 1.2825005209 -0.5679690427  
H 4.5402803346 -1.2128710674 -0.8310249383  
H 2.4472733829 -2.4955914468 -0.6090919708  
H 2.3706009665 2.4395238867 -0.1722353394  
H -2.0275378107 -2.7996455665 1.0789888826  
H -3.8814252914 -1.7830185212 2.3447556100  
H -3.9904611505 0.7076773000 2.6272112416  
H -2.2728688812 2.1255475931 1.5628744807  
H -0.8260545906 0.4769718349 -2.0102169530  
H -0.0430933837 2.0711963211 -2.1611511140  
H -1.7222040728 1.9459172435 -1.5434274291  
H 0.3094073007 2.7678743083 1.5153384790  
H -1.0436135137 3.2821156284 0.4650749483  
H 0.6051233706 3.3907995469 -0.1341677829  
H 0.8237583027 -3.1506819044 1.8113875597  
H 0.9184487629 -5.6566821952 1.6736474663  
H -0.5775239010 -5.4774737036 -2.3514645924  
H -1.9699062877 -11.0470120478 0.5897246959  
H -4.0129839729 -9.8575446272 1.3056637571  
H -4.0750843798 -7.3466327789 1.1929456240  
H -2.1063509080 -6.1061612402 0.3903031058  
H 2.3811529094 -5.8973399148 -1.3301093751  
H 4.4686752290 -6.9513571809 -2.0959260020  
H 4.6986819184 -9.4539102135 -2.0550628059  
H 2.8073061350 -10.8259002592 -1.2531230196  
H -0.3909369269 -10.4384030018 -2.3826879761  
H -0.8476527051 -11.6998116587 -1.2080402159  
H 0.8119187054 -11.6406767427 -1.8462792451  
H 1.1556230107 -10.2832272860 1.6806348885  
H 1.7481767911 -11.5323482980 0.5538096005

H 0.0872647719 -11.6233826097 1.1849484320

XYZ coordinates of 2Ac-2F<sub>3</sub>Ph  $\omega$ = 0.0630 optimized at DFT/ $\omega$ \*pbeh/de2-svp PCM in Toluene

C -4.8198583263 -3.7106085125 -0.0518304991

C -3.4283502059 -3.6591159570 -0.0939252229

C -2.7783405426 -2.4313147999 -0.1084959085

C -3.5048056957 -1.2264218259 -0.0822900772

C -4.9116046811 -1.2616329623 -0.0400257441

C -5.5336740824 -2.5161945784 -0.0252172216

N -2.8238510411 -0.0000015404 -0.1167855359

C -3.5048048146 1.2264220419 -0.0823688156

C -4.9116013283 1.2616361551 -0.0401058127

C -5.7718785194 0.0000034989 -0.0142486860

C -2.7783385633 2.4313128187 -0.1086447472

C -3.4283471830 3.6591148391 -0.0941513027

C -4.8198566385 3.7106114034 -0.0520609920

C -5.5336719566 2.5161996030 -0.0253740091

C -1.4059279377 -0.0000022051 -0.0709742626

C -0.6429473587 0.0000000866 -1.2413983703

C 0.7432152581 0.0000024567 -1.1605714514

C 1.4059271445 -0.0000007224 0.0709789489

C 0.6429476172 -0.0000057689 1.2414024430

C -0.7432146774 -0.0000026998 1.1605737923

F -1.4702957168 -0.0000088687 2.2828829026

F 1.4702956124 0.0000057728 -2.2828790433

N 2.8238508393 -0.0000011416 0.1167905031

C 3.5048056203 -1.2264223991 0.0822900536

C 4.9116048090 -1.2616341071 0.0400247356

C 5.7718785226 0.0000018714 0.0142528649

C 4.9116038681 1.2616355678 0.0401030936

C 3.5048054241 1.2264215641 0.0823662742

C 5.5336729025 2.5161980725 0.0253666142

C 4.8198561791 3.7106101334 0.0520503240

C 3.4283478882 3.6591160453 0.0941403699

C 2.7783398819 2.4313131687 0.1086391260

C 2.7783402392 -2.4313153576 0.1084933266

|   |               |               |               |
|---|---------------|---------------|---------------|
| C | 3.4283491043  | -3.6591168849 | 0.0939176231  |
| C | 4.8198568647  | -3.7106090468 | 0.0518212041  |
| C | 5.5336731994  | -2.5161954205 | 0.0252111514  |
| C | -6.6274049325 | 0.0000432239  | 1.2697608210  |
| C | -6.6982308390 | -0.0000329727 | -1.2480763500 |
| C | 6.6982201099  | -0.0000342627 | 1.2480880511  |
| C | 6.6274158905  | 0.0000410699  | -1.2697478632 |
| H | -5.3452921214 | -4.6679303144 | -0.0412706211 |
| H | -2.8373170380 | -4.5780098908 | -0.1183110450 |
| H | -1.6886804942 | -2.4026536307 | -0.1457610682 |
| H | -6.6251978289 | -2.5575132524 | 0.0080767144  |
| H | -1.6886782474 | 2.4026497541  | -0.1459043252 |
| H | -2.8373135884 | 4.5780077404  | -0.1185917682 |
| H | -5.3452889166 | 4.6679339945  | -0.0415603329 |
| H | -6.6251956472 | 2.5575208413  | 0.0079185607  |
| H | -1.1350040766 | -0.0000007779 | -2.2152143383 |
| H | 1.1350040069  | -0.0000088679 | 2.2152186835  |
| H | 6.6251966663  | 2.5575200665  | -0.0079248297 |
| H | 5.3452900798  | 4.6679334367  | 0.0415465364  |
| H | 2.8373149555  | 4.5780073940  | 0.1185788696  |
| H | 1.6886785231  | 2.4026498009  | 0.1458997536  |
| H | 1.6886790642  | -2.4026539150 | 0.1457586771  |
| H | 2.8373154510  | -4.5780102882 | 0.1183001510  |
| H | 5.3452903409  | -4.6679314097 | 0.0412573609  |
| H | 6.6251964428  | -2.5575142794 | -0.0080840878 |
| H | -5.9876130545 | 0.0000788637  | 2.1658767054  |
| H | -7.2765982249 | -0.8889251615 | 1.3107673894  |
| H | -7.2766113055 | 0.8890046625  | 1.3107053856  |
| H | -6.1098367392 | -0.0000653777 | -2.1788898546 |
| H | -7.3491759289 | 0.8886613907  | -1.2539064933 |
| H | -7.3491859863 | -0.8887215675 | -1.2538512421 |
| H | 6.1098184195  | -0.0000659453 | 2.1788977108  |
| H | 7.3491663300  | 0.8886605427  | 1.2539240949  |
| H | 7.3491751120  | -0.8887238402 | 1.2538693911  |
| H | 5.9876321278  | 0.0000773069  | -2.1658709537 |
| H | 7.2766101818  | -0.8889273239 | -1.3107500872 |
| H | 7.2766242642  | 0.8890024242  | -1.3106879857 |

XYZ coordinates of 2Ac-2CF<sub>3</sub>Ph  $\omega=0.0425$  optimized at DFT/ $\omega$ \*pbeh/de2-svp PCM in Toluene

|   |               |               |               |
|---|---------------|---------------|---------------|
| C | 3.3338907624  | 1.0974073107  | 2.0405674255  |
| C | 3.4589256692  | -0.2811577367 | 2.1842053277  |
| C | 2.5008647189  | -1.1144452243 | 1.6074710122  |
| C | 1.4096524850  | -0.6104645784 | 0.8940642250  |
| C | 1.2681140687  | 0.7900957620  | 0.8043435735  |
| C | 2.2436145723  | 1.6316667551  | 1.3595020599  |
| C | 0.4486913061  | -1.5044029476 | 0.1159073239  |
| C | -0.9352795942 | -0.8608148745 | 0.1342684137  |
| C | -1.0391047197 | 0.5436496275  | 0.0550430732  |
| N | 0.1351502576  | 1.3222819086  | 0.1502705434  |
| C | -2.1169366507 | -1.6069780124 | 0.1120450586  |
| C | -3.3690964309 | -1.0095544980 | -0.0307511508 |
| C | -3.4498407304 | 0.3733069884  | -0.1648508984 |
| C | -2.2937697436 | 1.1471387376  | -0.1176429334 |
| C | 0.0156550579  | 2.7386576469  | 0.0469981152  |
| C | -0.4125247254 | 3.4890130648  | 1.1444262811  |
| C | -0.5410165041 | 4.8750973787  | 1.0615123001  |
| C | -0.2380292722 | 5.5329808814  | -0.1387752097 |
| C | 0.1931525645  | 4.7831710551  | -1.2352924960 |
| C | 0.3213192947  | 3.3977702856  | -1.1525799231 |
| C | 0.7754960585  | 2.6172815154  | -2.3630454265 |
| C | -0.9944424116 | 5.6581615358  | 2.2703255458  |
| N | -0.3679080064 | 6.9484132077  | -0.2515310415 |
| C | -1.4984059181 | 7.4570895365  | -0.9291088261 |
| C | -1.6308264788 | 8.8517696865  | -1.0918420371 |
| C | -0.6713911031 | 9.7784797525  | -0.3521125667 |
| C | 0.7090949509  | 9.1295722281  | -0.3231899635 |
| C | 0.8057890294  | 7.7303818647  | -0.1739434230 |
| C | -2.4830106773 | 6.5953153003  | -1.4362109093 |
| C | -3.5684498219 | 7.1007986170  | -2.1460326798 |
| C | -3.6797349669 | 8.4700672734  | -2.3681686956 |
| C | -2.7158042834 | 9.3252581832  | -1.8350703101 |
| C | 1.8930957784  | 9.8724057981  | -0.3183690797 |
| C | 3.1404295505  | 9.2793906692  | -0.1252579560 |
| C | 3.2134064990  | 7.9047089925  | 0.0796427936  |
| C | 2.0555478270  | 7.1329775859  | 0.0500247249  |
| F | -0.0652423415 | 6.5520663846  | 2.6599851400  |

F -2.1312780615 6.3392462061 2.0302994793  
F -1.2309586530 4.8539228019 3.3235843208  
F 1.0089851557 3.4232509162 -3.4155129356  
F 1.9144870993 1.9390348144 -2.1252051816  
F -0.1517246029 1.7214905900 -2.7533143764  
C -0.6382514789 11.1802028942 -0.9647717815  
C -1.1662636511 9.8975734161 1.1104575088  
C 0.9316885369 -1.5546955060 -1.3545359729  
C 0.4258370339 -2.9343410595 0.6608963353  
H 4.0806435232 1.7716133486 2.4674000594  
H 4.3031823257 -0.7115690070 2.7275402647  
H 2.6211250324 -2.1948304398 1.7018531453  
H 2.1516058723 2.7141055111 1.2631158335  
H -2.0612654065 -2.6940845494 0.1881018244  
H -4.2705451161 -1.6260741590 -0.0527898663  
H -4.4174126670 0.8640231598 -0.2968507596  
H -2.3709921533 2.2310160905 -0.2113499250  
H -0.6464506884 2.9739130343 2.0770837374  
H 0.4258024892 5.2984577868 -2.1681546963  
H -2.4026417694 5.5192909833 -1.2779496557  
H -4.3225858949 6.4107434301 -2.5326822263  
H -4.5185573991 8.8771953882 -2.9371916160  
H -2.8260028718 10.3998121188 -1.9892712912  
H 1.8425496460 10.9544133917 -0.4504242444  
H 4.0437427732 9.8935071264 -0.1187007066  
H 4.1763310542 7.4184999898 0.2550413225  
H 2.1267106815 6.0551205409 0.2007588565  
H -0.2960222076 11.1647720876 -2.0116809999  
H 0.0261047156 11.8416942070 -0.3892779933  
H -1.6352333309 11.6434669230 -0.9278772399  
H -1.2171560573 8.9136320593 1.5987215066  
H -2.1743271268 10.3444786365 1.1351810239  
H -0.4811387269 10.5360214669 1.6930758260  
H 0.9737347982 -0.5517296452 -1.8024174095  
H 0.2452566033 -2.1715220162 -1.9585895739  
H 1.9413693613 -1.9954842076 -1.4054400942  
H 0.0935132498 -2.9706664308 1.7103327873  
H 1.4235265639 -3.3926323453 0.5919375628

## Section 4. Low Temperature Measurements

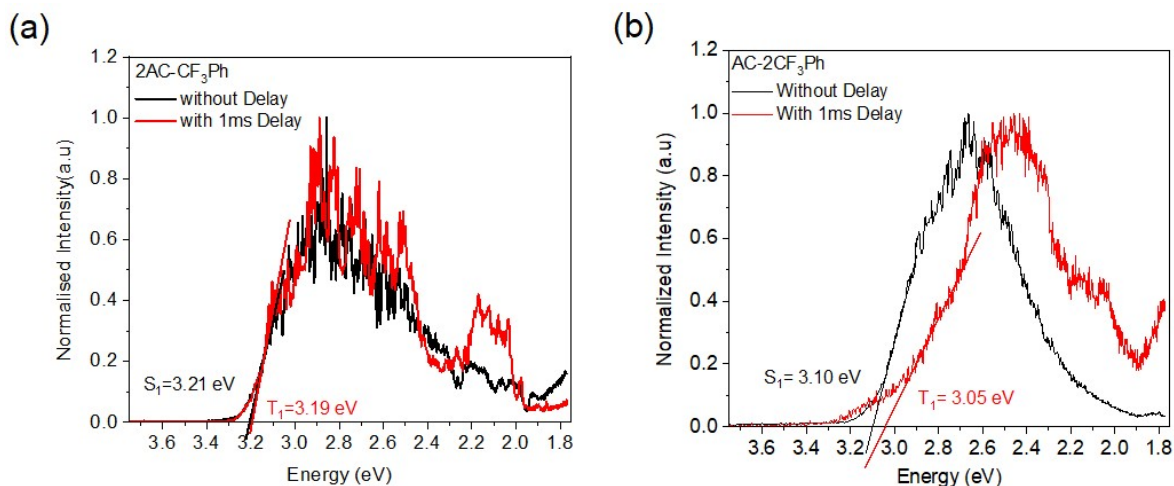

**Figure S7** Fluorescence and phosphorescence emission at 77K in me-THF with and without gate delay for (a) 2Ac-CF<sub>3</sub>Ph (b) AC-2CF<sub>3</sub>Ph.

## Section 5. Synthesis

**10,10'-(2-(trifluoromethyl)-1,4-phenylene)bis(9,9-dimethyl-9,10-dihydroacridine), 2AC-CF<sub>3</sub>Ph.** A mixture of 1,4-Dibromo-2-(trifluoromethyl)benzene (1.0g, 3.29mmol), 9,10-Dihydro-9,9-dimethylacridine (1.515g, 7.238mmol), Tris(dibenzylideneacetone) dipalladium (0) (0.15g, 0.163mmol), X-phos (0.109g, 0.228mmol), Sodium tert-butoxide (0.695g, 7.231 mmol), dry toluene (5mL) were added in a flask under argon atmosphere. The reaction mixture was stirred at 110-120°C for 24 hours. When the reaction was completed, crude product was purified by column chromatography by using silica, Dcm/Hex=1/5 as an eluent. The target compound was obtained as white powder. Yield: 0.252g (13.46%),

<sup>1</sup>H NMR (400 MHz, CDCl<sub>3</sub>) δ 7.99 (d, *J* = 2.4 Hz, 1H), 7.86 (dd, *J* = 8.3, 2.3 Hz, 1H), 7.69 (d, *J* = 8.3 Hz, 1H), 7.55 (dt, *J* = 7.6, 2.0 Hz, 4H), 7.17 – 7.01 (m, 8H), 6.42 (d, *J* = 8.1 Hz, 2H), 6.23 (d, *J* = 8.1 Hz, 2H), 1.97 (s, 3H), 1.75 (s, 6H), 1.48 (s, 3H).

<sup>13</sup>C NMR (101 MHz, CDCl<sub>3</sub>) δ 141.98, 141.18, 140.50, 139.65, 137.73, 137.47, 131.88, 131.83, 130.96, 130.50, 126.81, 126.57, 125.68, 125.30, 121.64, 121.52, 114.12, 36.26, 36.21, 34.48, 31.13, 27.24.

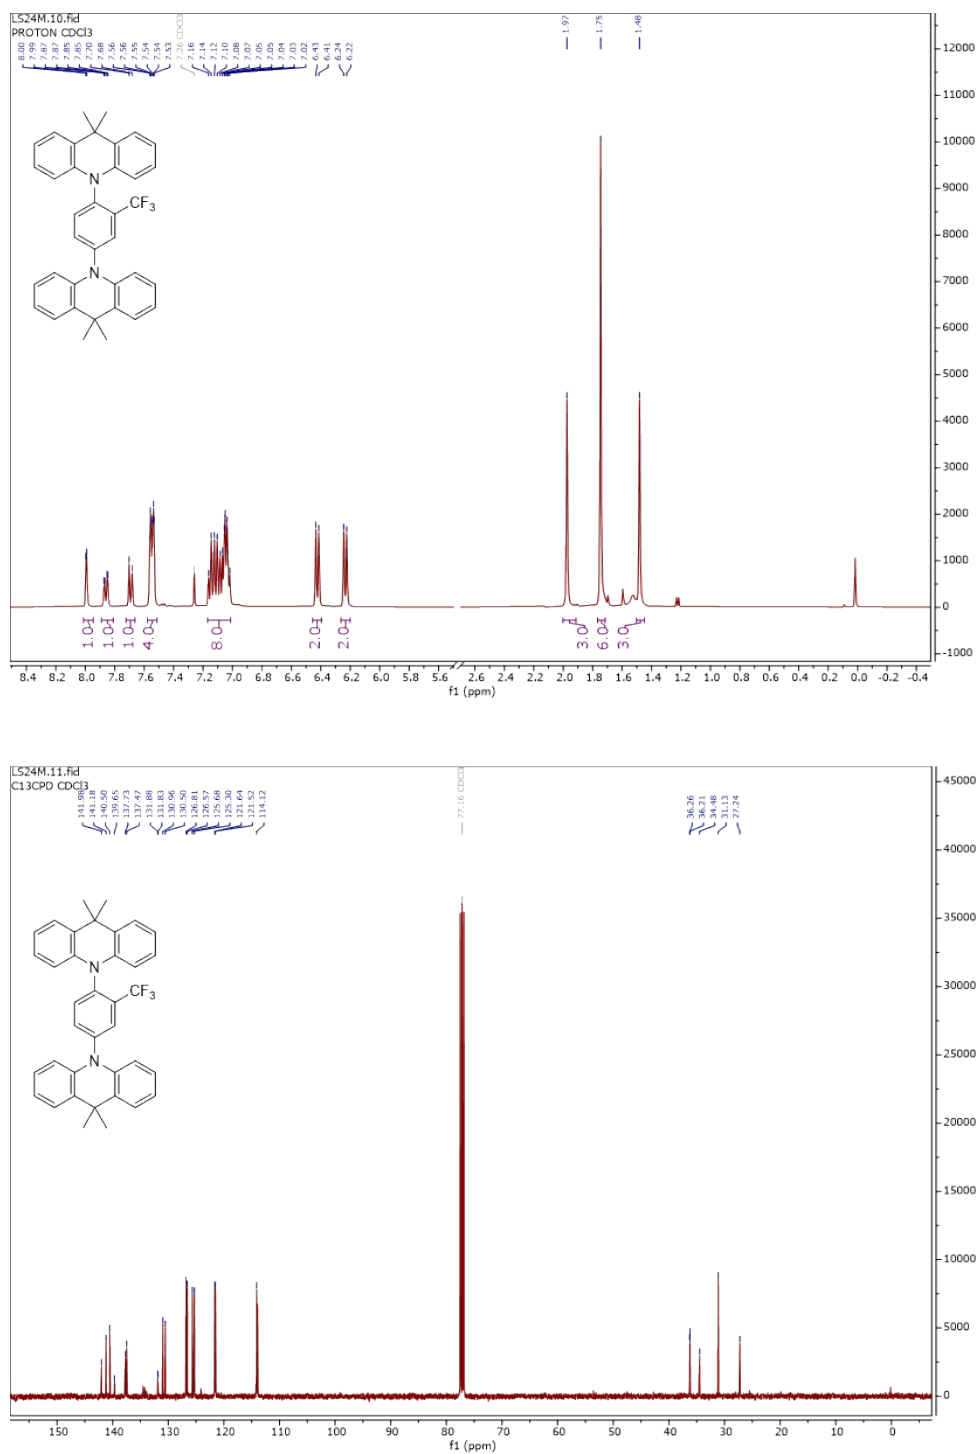

Figure S8  $^1\text{H}$  NMR spectrum (above) and  $^{13}\text{C}$  NMR spectrum (below) of 2AC- $\text{CF}_3\text{Ph}$ .

**10-(2,5-bis(trifluoromethyl)phenyl)-9,9-dimethyl-9,10-dihydroacridine, AC-2 $\text{CF}_3\text{Ph}$ .** A mixture of 2-Bromo-1,4-bis(trifluoromethyl)benzene (0.5g, 1.7mmol), 9,10-Dihydro-9,9-dimethylacridine (0.46g, 2.19mmol), Tris(dibenzylideneacetone) dipalladium (0) (0.07g, 0.35mmol), X-phos (0.05g, 0.1mmol), Sodium tert-butoxide (0.22g, 2.28mmol), dry toluene (5mL) were added in a flask under argon atmosphere. The reaction mixture was stirred at 110-120°C for 24 hours. When the reaction was completed, crude product was purified by column

chromatography by using silica, EA/Hex=1/9 as an eluent. The target compound was obtained as **white powder**.

Yield: 0.67g (93.18%),

$^1\text{H}$  NMR (400 MHz,  $\text{CDCl}_3$ )  $\delta$  8.13 (d,  $J = 8.3$  Hz, 1H), 7.94 (d,  $J = 8.3$  Hz, 1H), 7.73 (s, 1H), 7.51 (dd,  $J = 5.9, 3.4$  Hz, 2H), 7.00 (dd,  $J = 6.1, 3.4$  Hz, 4H), 5.96 (dt,  $J = 7.5, 3.7$  Hz, 2H), 1.93 (s, 3H), 1.45 (s, 3H).

$^{13}\text{C}$  NMR (101 MHz,  $\text{CDCl}_3$ )  $\delta$  141.16, 140.83, 132.11, 132.08, 130.43, 129.75, 129.70, 126.61, 125.94, 125.43, 121.66, 113.85, 36.15, 34.55, 29.86, 27.59.

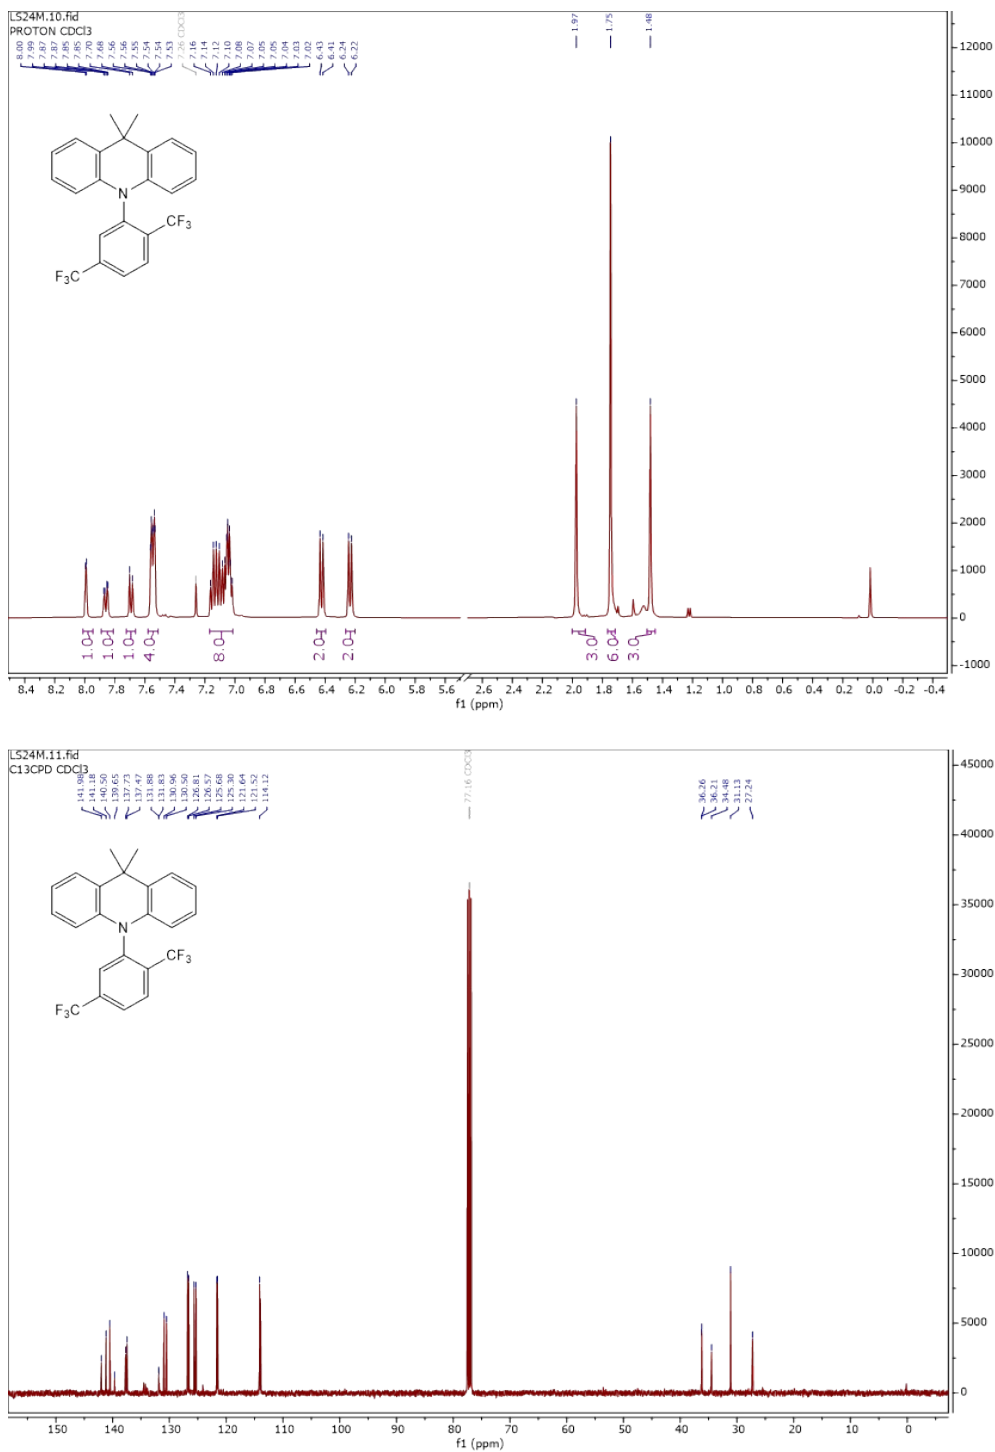

Figure S9  $^1\text{H}$  NMR spectrum (above) and  $^{13}\text{C}$  NMR spectrum (below) of AC-2CF<sub>3</sub>Ph.

The NMR data and synthetic procedures for structures 2Ac-2F<sub>2</sub>Ph and 2Ac-2CF<sub>3</sub>Ph are not included here, as both molecules have been previously reported in the literature.

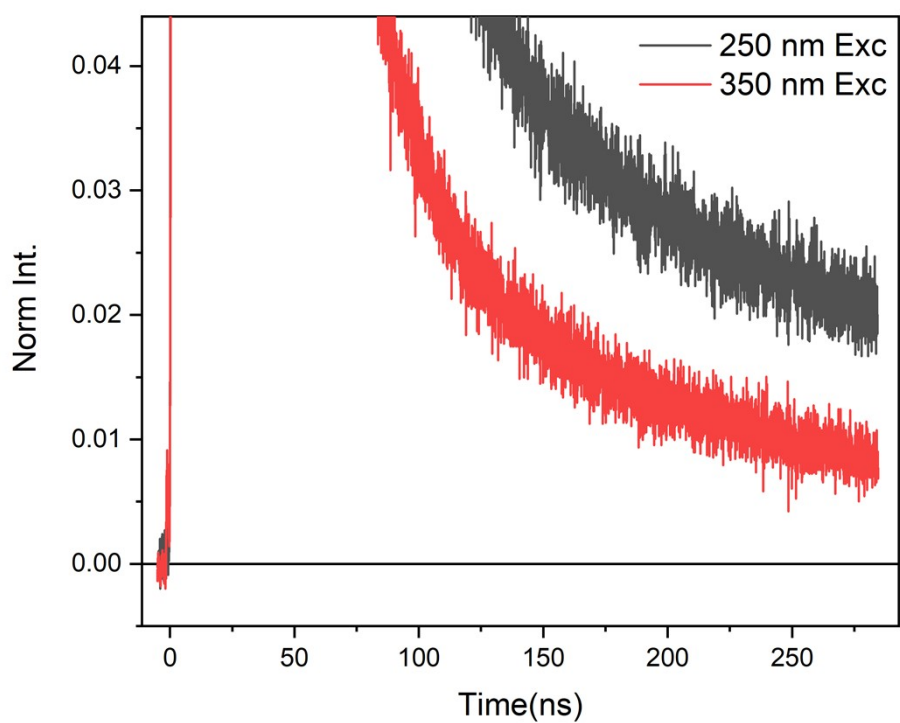

**Figure S10.** Rescaled time-resolved photoluminescence decay of 2Ac-2CF<sub>3</sub>Ph measured at  $\lambda_{em} = 550$  nm following excitation at  $\lambda_{exc} = 250$  nm (black) and at  $\lambda_{exc} = 350$  nm (red). The data are presented on an expanded intensity scale to highlight the long-time decay component. The delayed emission associated with thermally activated delayed fluorescence (TADF) becomes more apparent at longer times, confirming its presence despite being obscured by the dominant prompt emission in the main text.

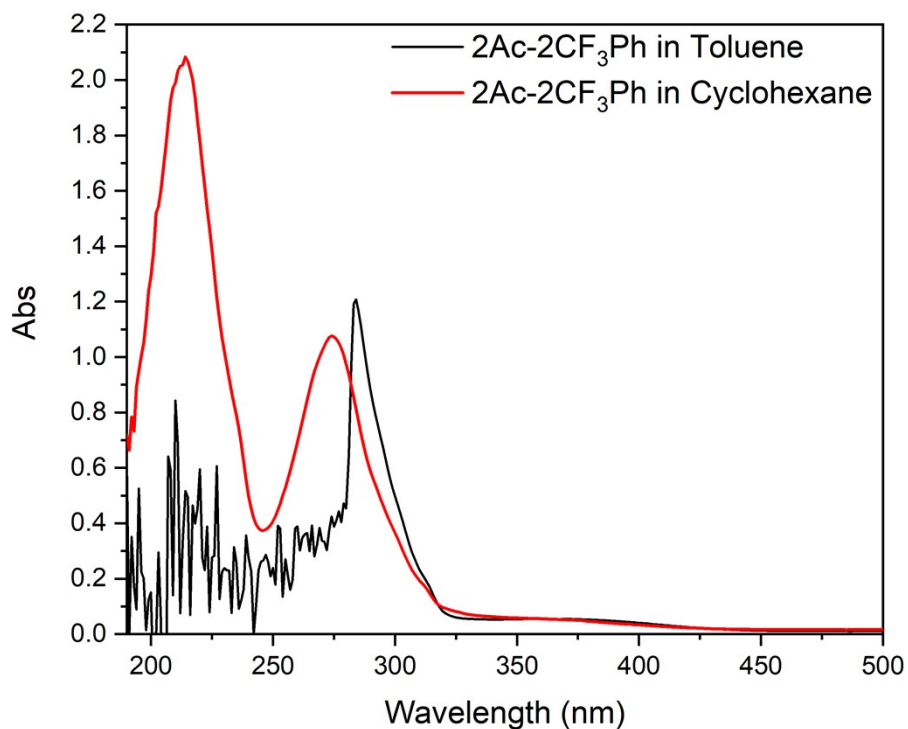

**Figure S11.** UV–vis absorption spectrum of 2Ac–2CF<sub>3</sub>Ph in toluene and cyclohexane, measured using the respective solvent as a blank. The featureless absorbance observed between 200–300 nm in toluene arises from the strong intrinsic absorption of toluene in this region (see Figure S2 for the absorbance of the neat solvents).

## References

- 1 N. I. Zahid, M. S. Mahmood, B. Subramanian, S. Mohd Said and O. K. Abou-Zied, *J Phys Chem Lett*, 2017, 8, 5603–5608.
- 2 I. S. Ufimtsev and T. J. Martinez, *J Chem Theory Comput*, 2009, 5, 2619–2628.
- 3 H. Sun, C. Zhong and J.-L. Brédas, *J Chem Theory Comput*, 2015, 11, 3851–3858.
- 4 F. Neese, *WIREs Computational Molecular Science*, 2012, 2, 73–78.
- 5 S. A. Prah, *Optical absorption spectrum of toluene in cyclohexane (PhotochemCAD 2.1a data)*, Oregon Medical Laser Center, 2017, <https://omlc.org/spectra/PhotochemCAD/data/090-abs.txt> (accessed 1 December 2025).
